# Supplementary material for: Reductive O-triflylation of naphthalene diimide: access to alkyne- and amine-functionalized 2,7-diazapyrenes
Source: Royal Society of Chemistry journal article supplement (doi:10.1039/d1qo00862e), 2021-01-01
Supplement: d1qo00862e1.pdf [file d1qo00862e1.pdf]

# Supporting Information

## Reductive O-Triflylation of Naphthalene Diimide: Access to Alkyne- and Amine-functionalized 2,7-Diazapyrenes

Simon Werner,<sup>a</sup> Tobias Vollgraff,<sup>a</sup> Qitang Fan,<sup>a</sup> Kevin Bania,<sup>a</sup> J. Michael Gottfried,<sup>a</sup> and Jörg Sundermeyer\*<sup>a</sup>

## Contents

|                                                                                             |    |
|---------------------------------------------------------------------------------------------|----|
| Density functional theory (DFT).....                                                        | 3  |
| Kohn-Sham frontier molecular orbitals and optimized geometries.....                         | 3  |
| TD-DFT calculations.....                                                                    | 10 |
| Concentration-dependent UV-Vis spectroscopy .....                                           | 12 |
| UV-Vis spectra in different solvents .....                                                  | 13 |
| Determination of fluorescence quantum yields .....                                          | 14 |
| Single crystal X-ray structures .....                                                       | 15 |
| Crystal Data .....                                                                          | 15 |
| 1,3,6,8-Tetrakis((trimethylsilyl)oxy)benzo[Imn][3,8]phenanthroline (2a).....                | 15 |
| 1,3,6,8-Tetrakis((tert-butyl)dimethylsilyl)oxy)benzo[Imn][3,8]phenanthroline (2f) .....     | 15 |
| 1,3,6,8-Tetrakis((trimethylsilyl)ethynyl)benzo[Imn][3,8]phenanthroline (3b).....            | 15 |
| Molecular structures of the title compounds.....                                            | 16 |
| 1,3,6,8-Tetrakis((trimethylsilyl)oxy)benzo[Imn][3,8]phenanthroline (2a) .....               | 16 |
| 1,3,6,8-Tetrakis((tert-butyl)dimethylsilyl)oxy)benzo[Imn][3,8]phenanthroline (2f) .....     | 17 |
| 1,3,6,8-Tetrakis((trimethylsilyl)ethynyl)benzo[Imn][3,8]phenanthroline (3b) .....           | 19 |
| EI-MS spectrum of 1,3,6,8-tetraiodobenzo[Imn][3,8]phenanthroline (11) .....                 | 22 |
| NMR spectra .....                                                                           | 23 |
| 1,3,6,8-Tetrakis((trimethylsilyl)oxy)benzo[Imn][3,8]phenanthroline (2a).....                | 23 |
| 1,3,6,8-Tetrakis((triisopropylsilyl)oxy)benzo[Imn][3,8]phenanthroline (2e).....             | 24 |
| 1,3,6,8-Tetrakis((tert-butyl)dimethylsilyl)oxy)benzo[Imn][3,8]phenanthroline (2f) .....     | 25 |
| Benzo[Imn][3,8]phenanthroline-1,3,6,8-tetrayltetrakis(trifluoromethanesulfonate) (2d) ..... | 26 |
| 1,3,6,8-Tetrakis((trimethylsilyl)ethynyl)benzo[Imn][3,8]phenanthroline (3b).....            | 28 |
| 1,3,6,8-Tetrakis((4-(tert-butyl)phenyl)ethynyl)benzo[Imn][3,8]phenanthroline (3d).....      | 29 |

## Density functional theory (DFT)

### Kohn-Sham frontier molecular orbitals and optimized geometries

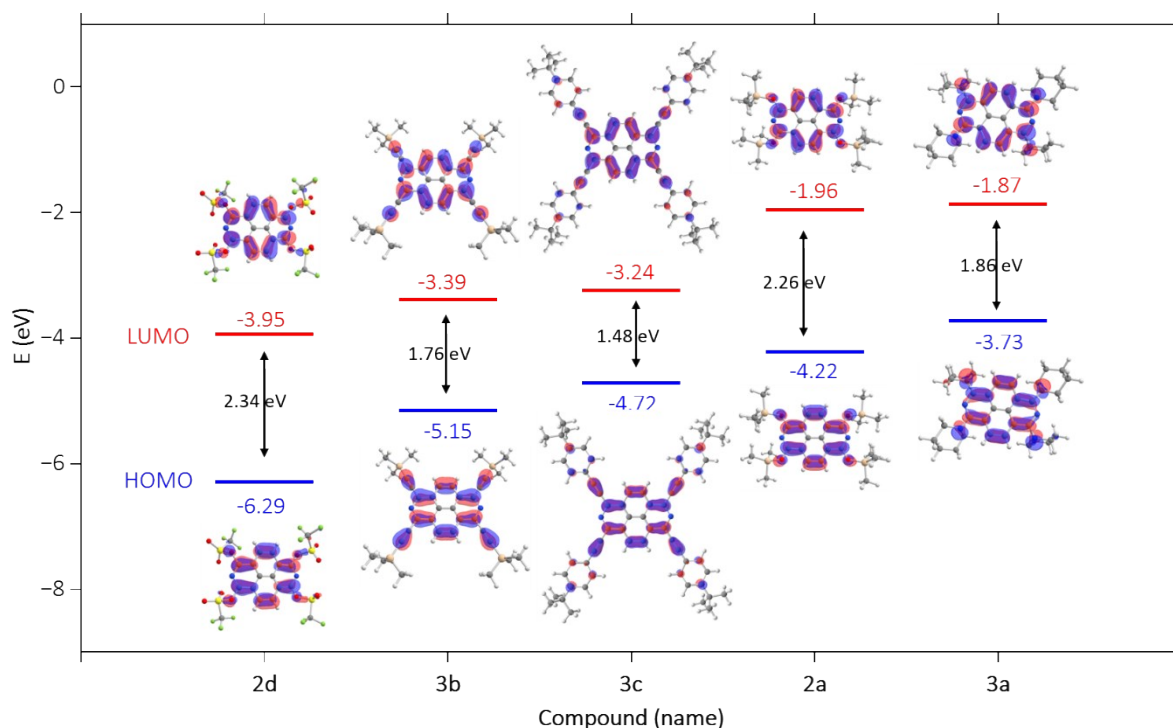

**Figure S1.** Kohn-Sham orbitals of HOMO and LUMO of **2a**, **2d**, **3a**, **3b** and **3c**, and their energies calculated by DFT (def2-TZVPP/PBE level of theory).

**Table S1.** Cartesian coordinates (XYZ) of DFT optimized geometry of **2d** (def2-TZVPP/PBE).

|   |              |              |              |
|---|--------------|--------------|--------------|
| C | -2.759505000 | 1.260306000  | 0.603317000  |
| C | -1.391672000 | 1.372323000  | 0.286771000  |
| C | -0.698449000 | 0.137576000  | 0.124201000  |
| C | -1.376063000 | -1.106231000 | 0.275932000  |
| C | -2.738411000 | -1.012287000 | 0.620135000  |
| N | -3.399768000 | 0.119167000  | 0.786372000  |
| C | -0.683868000 | 2.605966000  | 0.136278000  |
| C | 0.650423000  | 2.613908000  | -0.163585000 |
| C | 1.366657000  | 1.388846000  | -0.341810000 |
| C | 0.681902000  | 0.146029000  | -0.207203000 |
| C | 1.367983000  | -1.089357000 | -0.386981000 |
| C | 0.665179000  | -2.324298000 | -0.229518000 |
| C | -0.664816000 | -2.332461000 | 0.090682000  |
| C | 2.735180000  | 1.293376000  | -0.660791000 |
| N | 3.383206000  | 0.161072000  | -0.869599000 |
| C | 2.729619000  | -0.978342000 | -0.728953000 |
| O | -3.470644000 | 2.434788000  | 0.835115000  |
| S | -4.828543000 | 2.801207000  | -0.031497000 |
| O | -5.680020000 | 3.515782000  | 0.874340000  |
| O | -5.239999000 | 1.695077000  | -0.849845000 |
| C | -4.046896000 | 4.075545000  | -1.181327000 |
| F | -3.466544000 | 5.052868000  | -0.469745000 |
| F | -5.010107000 | 4.591488000  | -1.951518000 |
| F | -3.122907000 | 3.480631000  | -1.953650000 |
| O | -3.420179000 | -2.194536000 | 0.863175000  |
| S | -4.921959000 | -2.406175000 | 0.187370000  |
| O | -4.978770000 | -1.748873000 | -1.090624000 |
| O | -5.924401000 | -2.280865000 | 1.206533000  |
| C | -4.651980000 | -4.249184000 | -0.118454000 |

|   |              |              |              |
|---|--------------|--------------|--------------|
| F | -5.773054000 | -4.734687000 | -0.664138000 |
| F | -4.397634000 | -4.881402000 | 1.032751000  |
| F | -3.626240000 | -4.429019000 | -0.964656000 |
| O | 3.419295000  | -2.150155000 | -0.998550000 |
| S | 4.923327000  | -2.366179000 | -0.329033000 |
| O | 4.976657000  | -1.737639000 | 0.963496000  |
| O | 5.923864000  | -2.210584000 | -1.345894000 |
| C | 4.666704000  | -4.217530000 | -0.064916000 |
| F | 4.415484000  | -4.825240000 | -1.229921000 |
| F | 5.791823000  | -4.707339000 | 0.468462000  |
| F | 3.643258000  | -4.423760000 | 0.778026000  |
| O | 3.438204000  | 2.477681000  | -0.866106000 |
| S | 4.793877000  | 2.833913000  | 0.008137000  |
| O | 5.638261000  | 3.577597000  | -0.880750000 |
| O | 5.215478000  | 1.711427000  | 0.798550000  |
| C | 4.003350000  | 4.073080000  | 1.189915000  |
| F | 3.085472000  | 3.451725000  | 1.948600000  |
| F | 4.963364000  | 4.578001000  | 1.971315000  |
| F | 3.413852000  | 5.062699000  | 0.503265000  |
| H | -1.222325000 | 3.541710000  | 0.272969000  |
| H | 1.182462000  | 3.556146000  | -0.279127000 |
| H | 1.206830000  | -3.257846000 | -0.370696000 |
| H | -1.200053000 | -3.272645000 | 0.210681000  |

**Table S2.** Cartesian coordinates (XYZ) of DFT optimized geometry of **3b** (def2-TZVPP/PBE).

|    |              |              |              |
|----|--------------|--------------|--------------|
| C  | -3.160475000 | 1.164221000  | -0.212204000 |
| C  | -1.738544000 | 1.238113000  | -0.110055000 |
| C  | -1.027614000 | 0.009050000  | -0.070901000 |
| C  | -1.730261000 | -1.223809000 | -0.133226000 |
| C  | -3.152651000 | -1.157580000 | -0.234415000 |
| N  | -3.835746000 | 0.001496000  | -0.271987000 |
| C  | -1.010738000 | 2.463097000  | -0.046467000 |
| C  | 0.357516000  | 2.466813000  | 0.051831000  |
| C  | 1.093473000  | 1.245763000  | 0.093541000  |
| C  | 0.390882000  | 0.012864000  | 0.031158000  |
| C  | 1.101821000  | -1.216200000 | 0.070516000  |
| C  | 0.374044000  | -2.441145000 | 0.006107000  |
| C  | -0.994210000 | -2.444827000 | -0.092264000 |
| C  | 2.515741000  | 1.179560000  | 0.195948000  |
| N  | 3.198844000  | 0.020509000  | 0.233945000  |
| C  | 2.523714000  | -1.142236000 | 0.173612000  |
| C  | -3.928510000 | 2.361928000  | -0.254680000 |
| C  | -3.912581000 | -2.359400000 | -0.300198000 |
| C  | 3.292077000  | -2.339740000 | 0.215978000  |
| C  | 3.275777000  | 2.381277000  | 0.262106000  |
| C  | -4.551129000 | 3.417099000  | -0.287962000 |
| C  | 3.891635000  | 3.439534000  | 0.316601000  |
| C  | 3.914228000  | -3.395183000 | 0.249595000  |
| C  | -4.528099000 | -3.417895000 | -0.353873000 |
| Si | -5.507719000 | 4.988925000  | -0.339242000 |
| C  | -4.286947000 | 6.415797000  | -0.224349000 |
| C  | -6.690788000 | 5.004527000  | 1.121688000  |
| C  | -6.452347000 | 5.049332000  | -1.963517000 |
| Si | 4.840370000  | 5.015338000  | 0.386655000  |
| C  | 3.613405000  | 6.437959000  | 0.285484000  |
| C  | 6.025275000  | 5.051850000  | -1.072381000 |
| C  | 5.782501000  | 5.062750000  | 2.012919000  |
| Si | 4.875212000  | -4.964854000 | 0.281056000  |
| C  | 3.663919000  | -6.391753000 | 0.090622000  |
| C  | 5.775719000  | -5.071130000 | 1.927984000  |
| C  | 6.097138000  | -4.932732000 | -1.147068000 |
| Si | -5.474277000 | -4.994730000 | -0.435550000 |
| C  | -4.244735000 | -6.415582000 | -0.341334000 |
| C  | -6.413262000 | -5.032916000 | -2.063777000 |
| C  | -6.662008000 | -5.043271000 | 1.020857000  |
| H  | -1.570059000 | 3.398417000  | -0.077964000 |
| H  | 0.910531000  | 3.405150000  | 0.100207000  |
| H  | 0.933410000  | -3.376456000 | 0.037110000  |
| H  | -1.547209000 | -3.383147000 | -0.141285000 |
| H  | -3.576827000 | 6.394518000  | -1.062432000 |

|   |              |              |              |
|---|--------------|--------------|--------------|
| H | -4.814350000 | 7.380392000  | -0.249973000 |
| H | -3.712143000 | 6.367583000  | 0.710728000  |
| H | -7.380625000 | 4.151048000  | 1.075131000  |
| H | -7.287439000 | 5.928350000  | 1.125117000  |
| H | -6.143759000 | 4.946782000  | 2.072445000  |
| H | -7.042946000 | 5.974505000  | -2.032120000 |
| H | -5.765621000 | 5.017288000  | -2.820195000 |
| H | -7.139707000 | 4.196770000  | -2.047991000 |
| H | 2.904474000  | 6.407040000  | 1.124268000  |
| H | 4.136848000  | 7.404503000  | 0.318885000  |
| H | 3.037884000  | 6.395515000  | -0.649418000 |
| H | 6.718039000  | 4.200319000  | -1.034787000 |
| H | 6.618551000  | 5.977815000  | -1.064431000 |
| H | 5.479627000  | 5.003077000  | -2.024442000 |
| H | 6.367945000  | 5.990290000  | 2.092680000  |
| H | 5.094721000  | 5.017311000  | 2.868135000  |
| H | 6.474345000  | 4.212998000  | 2.088642000  |
| H | 3.114159000  | -6.317443000 | -0.857699000 |
| H | 4.194583000  | -7.354842000 | 0.101610000  |
| H | 2.931431000  | -6.398346000 | 0.909498000  |
| H | 6.458092000  | -4.219992000 | 2.056135000  |
| H | 6.366926000  | -5.996656000 | 1.985545000  |
| H | 5.065971000  | -5.065674000 | 2.766294000  |
| H | 5.575543000  | -4.848053000 | -2.110014000 |
| H | 6.782052000  | -4.078847000 | -1.056349000 |
| H | 6.697251000  | -5.854195000 | -1.162152000 |
| H | -3.672885000 | -6.379586000 | 0.596101000  |
| H | -4.765927000 | -7.382911000 | -0.384768000 |
| H | -3.532455000 | -6.375645000 | -1.176898000 |
| H | -7.106219000 | -4.183712000 | -2.135405000 |
| H | -6.997286000 | -5.960725000 | -2.150641000 |
| H | -5.724093000 | -4.981016000 | -2.917513000 |
| H | -7.253217000 | -5.970469000 | 1.005827000  |
| H | -6.118474000 | -4.999248000 | 1.974351000  |
| H | -7.356692000 | -4.193128000 | 0.987112000  |

**Table S3.** Cartesian coordinates (XYZ) of DFT optimized geometry of **3c** (def2-TZVPP/PBE).

|   |              |              |              |
|---|--------------|--------------|--------------|
| C | -2.847646000 | 1.153763000  | -0.056361000 |
| C | -1.420347000 | 1.230867000  | -0.003899000 |
| C | -0.704821000 | 0.003959000  | 0.018772000  |
| C | -1.405464000 | -1.231374000 | -0.010485000 |
| C | -2.833561000 | -1.171169000 | -0.062486000 |
| N | -3.520566000 | -0.012728000 | -0.084193000 |
| C | -0.694545000 | 2.455733000  | 0.026152000  |
| C | 0.677643000  | 2.463889000  | 0.076124000  |
| C | 1.418212000  | 1.247745000  | 0.099535000  |
| C | 0.717550000  | 0.012416000  | 0.070689000  |
| C | 1.433067000  | -1.214483000 | 0.093212000  |
| C | 0.707272000  | -2.439370000 | 0.062827000  |
| C | -0.664917000 | -2.447554000 | 0.012724000  |
| C | 2.846371000  | 1.187652000  | 0.150462000  |
| N | 3.533342000  | 0.029257000  | 0.172062000  |
| C | 2.860387000  | -1.137277000 | 0.145313000  |
| C | -3.622890000 | 2.340721000  | -0.081480000 |
| C | -3.594918000 | -2.366881000 | -0.094239000 |
| C | 3.635743000  | -2.324102000 | 0.171243000  |
| C | 3.607087000  | 2.383901000  | 0.180834000  |
| C | -4.275547000 | 3.374123000  | -0.102719000 |
| C | 4.246225000  | 3.425620000  | 0.206206000  |
| C | 4.288920000  | -3.357180000 | 0.192162000  |
| C | -4.236665000 | -3.406969000 | -0.120989000 |
| C | -5.052023000 | 4.556846000  | -0.124302000 |
| C | 5.006286000  | 4.618677000  | 0.242110000  |
| C | 5.066546000  | -4.539068000 | 0.215873000  |
| C | -5.005385000 | -4.594454000 | -0.153952000 |
| C | -6.458905000 | 4.496983000  | -0.158162000 |
| C | -7.219459000 | 5.663238000  | -0.178383000 |
| C | -6.622013000 | 6.932196000  | -0.166565000 |
| C | -5.216216000 | 6.982435000  | -0.133385000 |
| C | -4.442782000 | 5.830454000  | -0.112407000 |

|   |              |               |              |
|---|--------------|---------------|--------------|
| C | -4.393842000 | -5.862805000  | -0.134012000 |
| C | -5.161877000 | -7.023945000  | -0.167071000 |
| C | -6.562574000 | -6.977527000  | -0.221093000 |
| C | -7.165199000 | -5.706033000  | -0.240633000 |
| C | -6.415477000 | -4.538842000  | -0.208215000 |
| C | 6.473321000  | -4.477470000  | 0.251276000  |
| C | 7.235215000  | -5.642804000  | 0.273879000  |
| C | 6.639267000  | -6.912478000  | 0.262789000  |
| C | 5.233575000  | -6.964430000  | 0.227840000  |
| C | 4.458801000  | -5.813391000  | 0.204620000  |
| C | 6.413856000  | 4.578010000   | 0.274477000  |
| C | 7.158109000  | 5.754377000   | 0.309541000  |
| C | 6.543074000  | 7.014938000   | 0.314355000  |
| C | 5.136712000  | 7.046026000   | 0.282422000  |
| C | 4.379374000  | 5.883735000   | 0.246721000  |
| C | -7.430318000 | 8.232372000   | -0.188576000 |
| C | -8.943358000 | 7.978197000   | -0.220524000 |
| C | -7.102079000 | 9.055336000   | 1.074411000  |
| C | -7.047397000 | 9.046129000   | -1.442162000 |
| C | -7.435101000 | -8.235058000  | -0.258597000 |
| C | -6.602754000 | -9.523975000  | -0.229485000 |
| C | -8.376025000 | -8.236191000  | 0.964083000  |
| C | -8.277687000 | -8.229389000  | -1.551023000 |
| C | 7.449066000  | -8.211678000  | 0.287490000  |
| C | 8.961777000  | -7.955695000  | 0.320362000  |
| C | 7.065903000  | -9.023903000  | 1.541995000  |
| C | 7.122962000  | -9.037009000  | -0.974507000 |
| C | 7.333282000  | 8.325810000   | 0.352589000  |
| C | 8.849680000  | 8.092154000   | 0.381020000  |
| C | 6.993229000  | 9.159931000   | -0.899920000 |
| C | 6.939629000  | 9.118423000   | 1.616354000  |
| H | -1.255802000 | 3.390127000   | 0.008563000  |
| H | 1.227559000  | 3.404900000   | 0.098253000  |
| H | 1.268567000  | -3.373748000  | 0.080136000  |
| H | -1.214820000 | -3.388561000  | -0.010473000 |
| H | -6.946196000 | 3.522286000   | -0.168002000 |
| H | -8.304164000 | 5.571992000   | -0.204049000 |
| H | -4.710334000 | 7.948830000   | -0.123621000 |
| H | -3.355218000 | 5.898899000   | -0.086799000 |
| H | -3.306538000 | -5.927748000  | -0.092158000 |
| H | -4.648768000 | -7.984170000  | -0.149952000 |
| H | -8.252163000 | -5.624024000  | -0.282390000 |
| H | -6.905591000 | -3.565682000  | -0.224309000 |
| H | 6.959428000  | -3.502178000  | 0.260550000  |
| H | 8.319781000  | -5.550262000  | 0.300760000  |
| H | 4.728846000  | -7.931429000  | 0.218372000  |
| H | 3.371355000  | -5.883160000  | 0.177643000  |
| H | 6.914705000  | 3.610162000   | 0.271592000  |
| H | 8.243987000  | 5.677878000   | 0.333578000  |
| H | 4.617506000  | 8.005379000   | 0.285445000  |
| H | 3.290936000  | 5.937311000   | 0.222709000  |
| H | -9.475970000 | 8.939154000   | -0.234608000 |
| H | -9.243877000 | 7.417788000   | -1.116916000 |
| H | -9.282256000 | 7.422522000   | 0.665069000  |
| H | -7.667995000 | 9.998285000   | 1.069181000  |
| H | -6.033960000 | 9.303329000   | 1.130837000  |
| H | -7.368157000 | 8.498831000   | 1.983745000  |
| H | -7.274608000 | 8.483214000   | -2.358076000 |
| H | -7.612238000 | 9.989403000   | -1.468164000 |
| H | -5.977578000 | 9.293038000   | -1.454491000 |
| H | -7.273392000 | -10.393864000 | -0.258171000 |
| H | -5.929280000 | -9.594138000  | -1.095216000 |
| H | -5.999194000 | -9.599013000  | 0.685977000  |
| H | -9.017498000 | -9.129318000  | 0.946938000  |
| H | -9.027881000 | -7.352796000  | 0.974951000  |
| H | -7.800743000 | -8.243003000  | 1.900252000  |
| H | -7.631078000 | -8.231929000  | -2.439446000 |
| H | -8.918769000 | -9.122180000  | -1.588519000 |
| H | -8.926369000 | -7.345432000  | -1.608311000 |
| H | 9.495500000  | -8.916012000  | 0.336064000  |
| H | 9.300697000  | -7.400730000  | -0.565668000 |
| H | 9.260958000  | -7.393813000  | 1.216280000  |
| H | 7.631720000  | -9.966537000  | 1.569998000  |

|   |             |              |              |
|---|-------------|--------------|--------------|
| H | 5.996330000 | -9.271911000 | 1.553688000  |
| H | 7.291660000 | -8.459309000 | 2.457234000  |
| H | 7.389159000 | -8.481600000 | -1.884475000 |
| H | 7.690075000 | -9.979223000 | -0.967278000 |
| H | 6.055216000 | -9.286463000 | -1.031524000 |
| H | 9.369111000 | 9.060060000  | 0.406874000  |
| H | 9.158203000 | 7.524805000  | 1.270304000  |
| H | 9.195752000 | 7.552192000  | -0.511487000 |
| H | 7.545947000 | 10.110537000 | -0.882870000 |
| H | 5.921720000 | 9.393672000  | -0.953061000 |
| H | 7.266767000 | 8.618669000  | -1.816213000 |
| H | 7.174789000 | 8.547227000  | 2.525105000  |
| H | 7.491494000 | 10.068958000 | 1.654131000  |
| H | 5.866541000 | 9.350502000  | 1.631919000  |

**Table S4.** Cartesian coordinates (XYZ) of DFT optimized geometry of **2a** (def2-TZVPP/PBE).

|    |              |              |              |
|----|--------------|--------------|--------------|
| C  | -2.821331000 | 1.156453000  | -0.081017000 |
| C  | -1.410020000 | 1.239659000  | -0.019038000 |
| C  | -0.704955000 | 0.005083000  | 0.000095000  |
| C  | -1.403843000 | -1.232194000 | -0.048001000 |
| C  | -2.814869000 | -1.154437000 | -0.121419000 |
| N  | -3.491489000 | -0.000316000 | -0.133737000 |
| C  | -0.683464000 | 2.470757000  | 0.031849000  |
| C  | 0.684184000  | 2.473383000  | 0.096821000  |
| C  | 1.416888000  | 1.245056000  | 0.117485000  |
| C  | 0.718003000  | 0.007812000  | 0.068168000  |
| C  | 1.423086000  | -1.226774000 | 0.085851000  |
| C  | 0.696483000  | -2.457917000 | 0.036680000  |
| C  | -0.671094000 | -2.460529000 | -0.029001000 |
| C  | 2.828641000  | 1.167415000  | 0.177009000  |
| N  | 3.504565000  | 0.013047000  | 0.201326000  |
| C  | 2.833721000  | -1.143791000 | 0.160941000  |
| O  | -3.519238000 | 2.310538000  | -0.088421000 |
| Si | -5.167361000 | 2.531505000  | 0.280109000  |
| C  | -5.307613000 | 4.398298000  | 0.327618000  |
| C  | -5.524959000 | 1.789789000  | 1.963154000  |
| C  | -6.269770000 | 1.843710000  | -1.068772000 |
| O  | -3.505595000 | -2.311297000 | -0.180787000 |
| Si | -5.111863000 | -2.540800000 | -0.695640000 |
| C  | -5.237474000 | -4.408155000 | -0.758483000 |
| C  | -5.321622000 | -1.796998000 | -2.402513000 |
| C  | -6.333698000 | -1.861543000 | 0.550996000  |
| O  | 3.530278000  | -2.298290000 | 0.191541000  |
| Si | 5.137039000  | -2.533021000 | 0.702386000  |
| C  | 5.271395000  | -4.400742000 | 0.719230000  |
| C  | 5.341178000  | -1.830280000 | 2.427257000  |
| C  | 6.357334000  | -1.817326000 | -0.525167000 |
| O  | 3.520798000  | 2.324413000  | 0.211799000  |
| Si | 5.168571000  | 2.562081000  | -0.147888000 |
| C  | 5.300048000  | 4.430117000  | -0.149151000 |
| C  | 5.532429000  | 1.863561000  | -1.847935000 |
| C  | 6.271540000  | 1.846162000  | 1.185798000  |
| H  | -1.244477000 | 3.403952000  | 0.016131000  |
| H  | 1.240514000  | 3.408712000  | 0.135390000  |
| H  | 1.257560000  | -3.391088000 | 0.051366000  |
| H  | -1.227496000 | -3.395851000 | -0.066700000 |
| H  | -5.043011000 | 4.838263000  | -0.644009000 |
| H  | -6.335583000 | 4.705563000  | 0.568197000  |
| H  | -4.639159000 | 4.825422000  | 1.087773000  |
| H  | -5.288259000 | 0.718753000  | 1.986527000  |
| H  | -6.585659000 | 1.913460000  | 2.225724000  |
| H  | -4.925261000 | 2.289744000  | 2.736792000  |
| H  | -7.312407000 | 2.151073000  | -0.899110000 |

|   |              |              |              |
|---|--------------|--------------|--------------|
| H | -5.962548000 | 2.229124000  | -2.051342000 |
| H | -6.234478000 | 0.749171000  | -1.104966000 |
| H | -5.056831000 | -4.848624000 | 0.231976000  |
| H | -6.238942000 | -4.719854000 | -1.088546000 |
| H | -4.502998000 | -4.830797000 | -1.457781000 |
| H | -5.094893000 | -0.723542000 | -2.400523000 |
| H | -6.351850000 | -1.930726000 | -2.763055000 |
| H | -4.647376000 | -2.287731000 | -3.118578000 |
| H | -7.357254000 | -2.161695000 | 0.281700000  |
| H | -6.121332000 | -2.257025000 | 1.554397000  |
| H | -6.297094000 | -0.767510000 | 0.600482000  |
| H | 5.094163000  | -4.817381000 | -0.282098000 |
| H | 6.273894000  | -4.715805000 | 1.042911000  |
| H | 4.538000000  | -4.844035000 | 1.406772000  |
| H | 5.108205000  | -0.758411000 | 2.451460000  |
| H | 6.371903000  | -1.966731000 | 2.785351000  |
| H | 4.669276000  | -2.342366000 | 3.130455000  |
| H | 7.381877000  | -2.119353000 | -0.261782000 |
| H | 6.148346000  | -2.188525000 | -1.538499000 |
| H | 6.315616000  | -0.722573000 | -0.547264000 |
| H | 5.032393000  | 4.844785000  | 0.832710000  |
| H | 6.326804000  | 4.748003000  | -0.380970000 |
| H | 4.630362000  | 4.872695000  | -0.899315000 |
| H | 5.299440000  | 0.792624000  | -1.898073000 |
| H | 6.593204000  | 1.997339000  | -2.105178000 |
| H | 4.932491000  | 2.380391000  | -2.610217000 |
| H | 7.312847000  | 2.163551000  | 1.026768000  |
| H | 5.959757000  | 2.204497000  | 2.177138000  |
| H | 6.242233000  | 0.750875000  | 1.193741000  |

**Table S5.** Cartesian coordinates (XYZ) of DFT optimized geometry of **3a** (def2-TZVPP/PBE).

|   |              |              |              |
|---|--------------|--------------|--------------|
| C | -2.917659000 | 1.065056000  | 0.437151000  |
| C | -1.498826000 | 1.184916000  | 0.519839000  |
| C | -0.744149000 | -0.023963000 | 0.474511000  |
| C | -1.406543000 | -1.285791000 | 0.473816000  |
| C | -2.829328000 | -1.265593000 | 0.430819000  |
| N | -3.531673000 | -0.127716000 | 0.414754000  |
| C | -0.808621000 | 2.410684000  | 0.773656000  |
| C | 0.558991000  | 2.458819000  | 0.821276000  |
| C | 1.347760000  | 1.286026000  | 0.614183000  |
| C | 0.687954000  | 0.027149000  | 0.510316000  |
| C | 1.441399000  | -1.183297000 | 0.521888000  |
| C | 0.741455000  | -2.420717000 | 0.670815000  |
| C | -0.626822000 | -2.469639000 | 0.650082000  |
| C | 2.770964000  | 1.266567000  | 0.638207000  |
| N | 3.475016000  | 0.130644000  | 0.591019000  |
| C | 2.862431000  | -1.060698000 | 0.515087000  |
| N | -3.734095000 | 2.196677000  | 0.403952000  |
| N | -3.555538000 | -2.465658000 | 0.412562000  |
| N | 3.681306000  | -2.189484000 | 0.456931000  |
| N | 3.495129000  | 2.464966000  | 0.723301000  |
| C | -5.156189000 | 2.032925000  | 0.709631000  |
| C | -6.014419000 | 1.743225000  | -0.526026000 |
| C | -5.788544000 | 2.813755000  | -1.596931000 |
| C | -4.294638000 | 2.958917000  | -1.896323000 |
| C | -3.495119000 | 3.226599000  | -0.614404000 |
| C | -4.970423000 | -2.389790000 | 0.770456000  |
| C | -5.484521000 | -3.777319000 | 1.154191000  |
| C | -5.253212000 | -4.788725000 | 0.028746000  |
| C | -3.783831000 | -4.782154000 | -0.400840000 |
| C | -3.330696000 | -3.363107000 | -0.729314000 |
| C | 5.086543000  | -2.045342000 | 0.840419000  |
| C | 6.003403000  | -1.686371000 | -0.333431000 |
| C | 5.831775000  | -2.693707000 | -1.473445000 |
| C | 4.354468000  | -2.820006000 | -1.853072000 |
| C | 3.493776000  | -3.159261000 | -0.629036000 |



|   |              |              |              |
|---|--------------|--------------|--------------|
| C | 4.891187000  | 2.367670000  | 1.144462000  |
| C | 5.383380000  | 3.730671000  | 1.630977000  |
| C | 5.205409000  | 4.804557000  | 0.554807000  |
| C | 3.758810000  | 4.823723000  | 0.054289000  |
| C | 3.324181000  | 3.426069000  | -0.375353000 |
| H | -1.389090000 | 3.303659000  | 1.000723000  |
| H | 1.061454000  | 3.388485000  | 1.085654000  |
| H | 1.311459000  | -3.326270000 | 0.873246000  |
| H | -1.139759000 | -3.412531000 | 0.835751000  |
| H | -5.256282000 | 1.232365000  | 1.450462000  |
| H | -5.493156000 | 2.977236000  | 1.174347000  |
| H | -5.736284000 | 0.752314000  | -0.915017000 |
| H | -7.075106000 | 1.699930000  | -0.234015000 |
| H | -6.346032000 | 2.571795000  | -2.513938000 |
| H | -6.179809000 | 3.781681000  | -1.236162000 |
| H | -3.916403000 | 2.033164000  | -2.360059000 |
| H | -4.114209000 | 3.776760000  | -2.611303000 |
| H | -2.425169000 | 3.271419000  | -0.840582000 |
| H | -3.787442000 | 4.204460000  | -0.191870000 |
| H | -5.077691000 | -1.684224000 | 1.602471000  |
| H | -5.569096000 | -1.982546000 | -0.070749000 |
| H | -4.960092000 | -4.109632000 | 2.064337000  |
| H | -6.554855000 | -3.709426000 | 1.400626000  |
| H | -5.564255000 | -5.796634000 | 0.340609000  |
| H | -5.881009000 | -4.516075000 | -0.837109000 |
| H | -3.154796000 | -5.178600000 | 0.412791000  |
| H | -3.629905000 | -5.427042000 | -1.279030000 |
| H | -2.271320000 | -3.337316000 | -1.005948000 |
| H | -3.905051000 | -2.988617000 | -1.604719000 |
| H | 5.149240000  | -1.288641000 | 1.629833000  |
| H | 5.401824000  | -3.015156000 | 1.266203000  |
| H | 5.742752000  | -0.674566000 | -0.678195000 |
| H | 7.048551000  | -1.660914000 | 0.011847000  |
| H | 6.432780000  | -2.400339000 | -2.346925000 |
| H | 6.206768000  | -3.681027000 | -1.149886000 |
| H | 3.997592000  | -1.869039000 | -2.281342000 |
| H | 4.210516000  | -3.595703000 | -2.621312000 |
| H | 2.436214000  | -3.189401000 | -0.909403000 |
| H | 3.766423000  | -4.160105000 | -0.249348000 |
| H | 4.959315000  | 1.615724000  | 1.939158000  |
| H | 5.530815000  | 2.008656000  | 0.311478000  |
| H | 4.814616000  | 4.011317000  | 2.531847000  |
| H | 6.440547000  | 3.647860000  | 1.925085000  |
| H | 5.498739000  | 5.792862000  | 0.938367000  |
| H | 5.875553000  | 4.581503000  | -0.293337000 |
| H | 3.090298000  | 5.174733000  | 0.857245000  |
| H | 3.646809000  | 5.517143000  | -0.792725000 |
| H | 2.279386000  | 3.417593000  | -0.703620000 |
| H | 3.940370000  | 3.101071000  | -1.242049000 |

## TD-DFT calculations

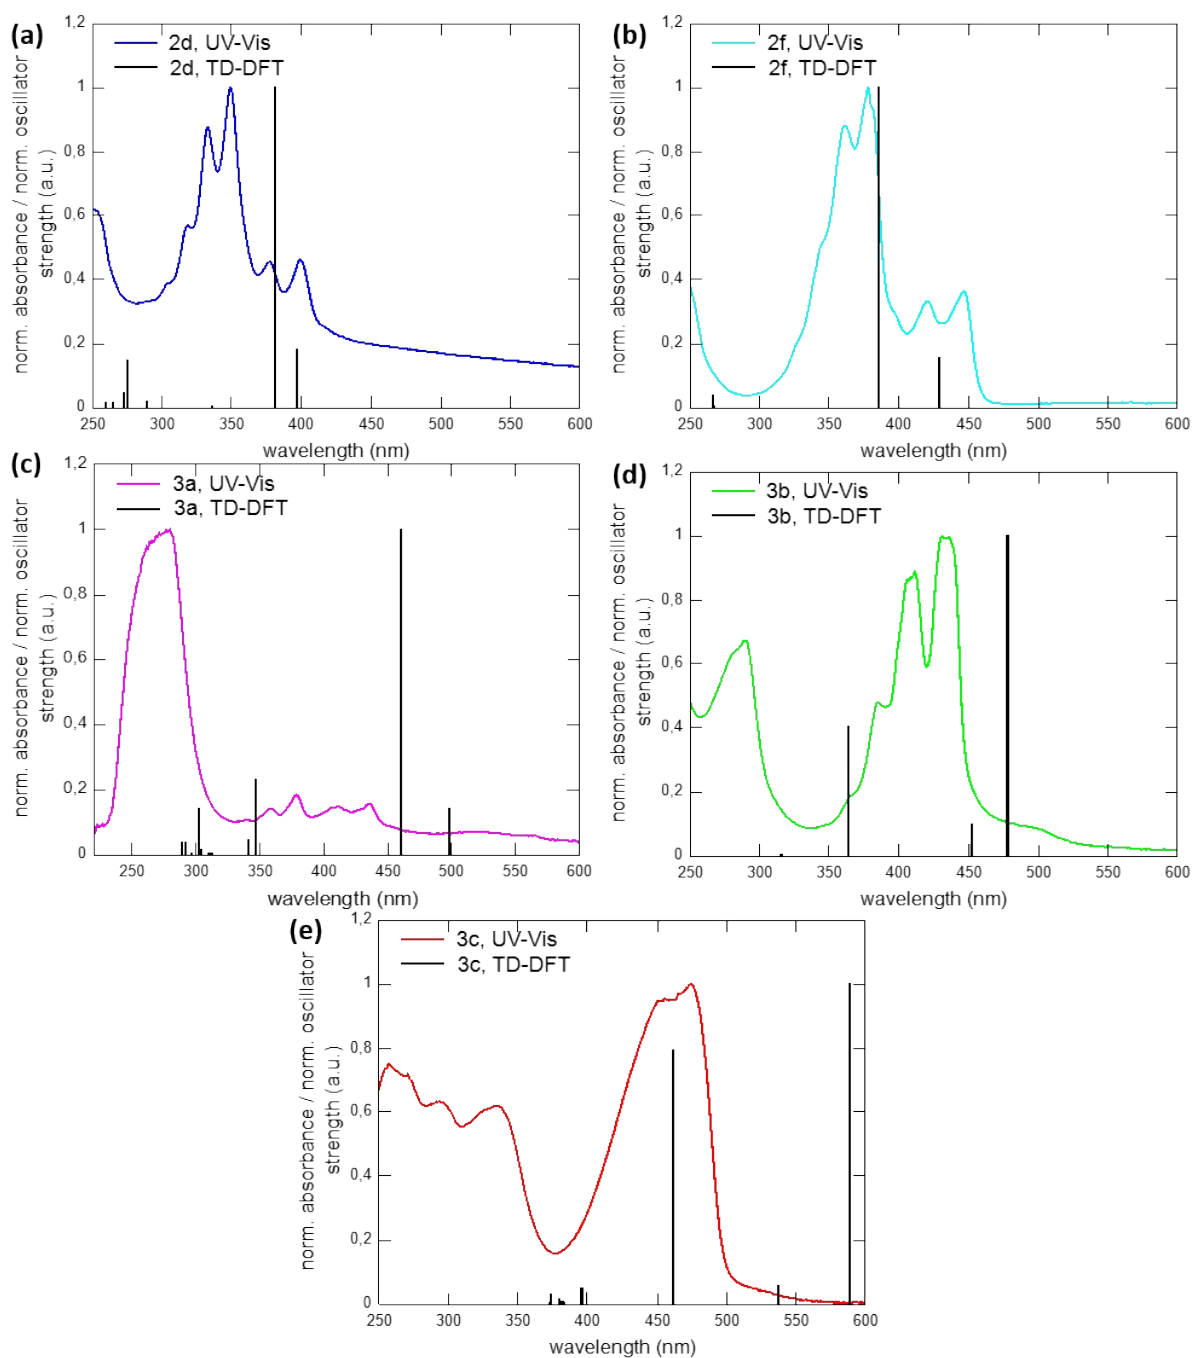

**Figure S2.** Comparison of normalized UV-Vis spectra (recorded in  $\text{CH}_2\text{Cl}_2$ ) and normalized electron transitions calculated by TD-DFT (black bars, def2-TZVPP/PBE level of theory) of a) **2d** (calculation for silyl ether **2a**); b) of **2f**; c) of **3a**; d) of **3b**; e) of **3c**.

**Table S6.** Characteristic main electron transition of **2a**, **2f**, **3a**, **3b** and **3c** calculated using TD-DFT (def2-TZVPP/PBE level of theory).

| Compound  | Transition energy (wavelength) | Oscillator strength | Description of main contributions                                                                                                                                            |
|-----------|--------------------------------|---------------------|------------------------------------------------------------------------------------------------------------------------------------------------------------------------------|
| <b>2a</b> | 2.88 eV (429 nm)               | 0.119               | HOMO→LUMO+1 (c = -0.950); 0.903<br>HOMO-1→LUMO+2 (c = -0.152); 0.023<br>HOMO-4→LUMO (c = -0.210 0.045)                                                                       |
|           | 3.22 eV (385 nm)               | 0.768               | HOMO→LUMO (c = 0.927); 0.859<br>HOMO-1→LUMO+3 (c = -0.105); 0.011<br>HOMO-2→LUMO+2 (c = 0.177); 0.031<br>HOMO-4→LUMO+1 (c = -0.241); 0.058                                   |
| <b>2d</b> | 3.13 eV (397 nm)               | 0.119               | HOMO→LUMO+1 (c = -0.937); 0.877<br>HOMO-3→LUMO+1 (c = -0.107); 0.011<br>HOMO-5→LUMO (c = -0.282); 0.080                                                                      |
|           | 3.26 eV (381 nm)               | 0.652               | HOMO→LUMO (c = 0.922); 0.849<br>HOMO-2→LUMO+2 (c = -0.165); 0.027<br>HOMO-5→LUMO+1 (c = -0.266); 0.071                                                                       |
| <b>3a</b> | 2.49 eV (498 nm)               | 0.115               | HOMO→LUMO (c = 0.246); 0.059<br>HOMO→LUMO+1 (c = 0.916); 0.839<br>HOMO-1→LUMO+2 (c = -0.134); 0.018<br>HOMO-3→LUMO (c = 0.196); 0.038<br>HOMO-8→LUMO (c = 0.112); 0.012      |
|           | 2.69 eV (460 nm)               | 0.818               | HOMO→LUMO (c = -0.913); 0.833<br>HOMO→LUMO+1 (c = 0.239); 0.057<br>HOMO-7→LUMO+2 (c = -0.114); 0.013<br>HOMO-8→LUMO (c = -0.114); 0.020<br>HOMO-9→LUMO+1 (c = -0.168); 0.028 |
| <b>3b</b> | 2.59 eV (478 nm)               | 1.115               | HOMO→LUMO (c = -0.959); 0.902<br>HOMO-11→LUMO+1 (c = 0.149); 0.022<br>HOMO-12→LUMO (c = 0.149); 0.022                                                                        |
| <b>3c</b> | 2.14 eV (579 nm)               | 1.632               | HOMO→LUMO (c = -0.960); 0.921<br>HOMO-6→LUMO (c = 0.170); 0.028                                                                                                              |

## Concentration-dependent UV-Vis spectroscopy

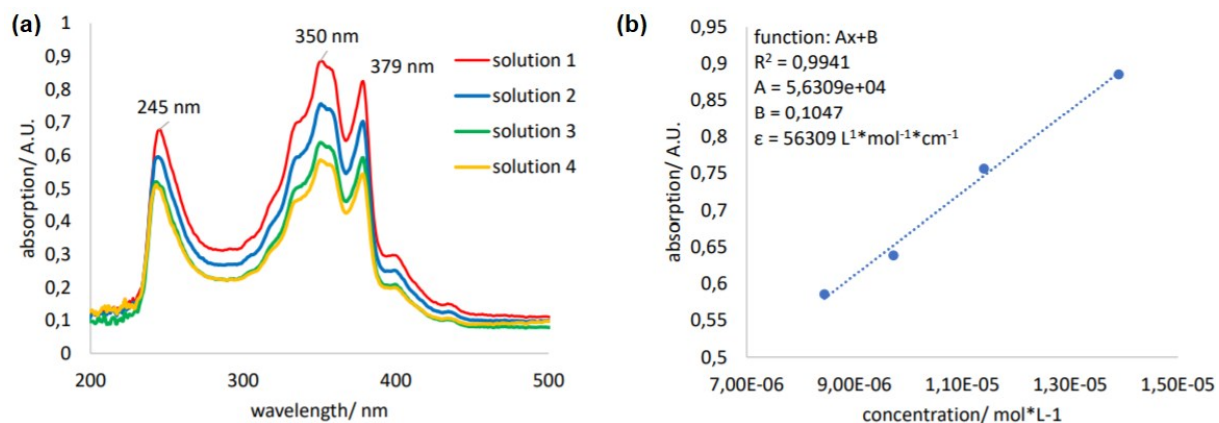

**Figure S3.** a) UV-Vis spectra of **2d** in dichloromethane in four different concentrations; b) corresponding linear regression of the absorbances for the determination of the molar decadic attenuation coefficient ( $\epsilon$ ).

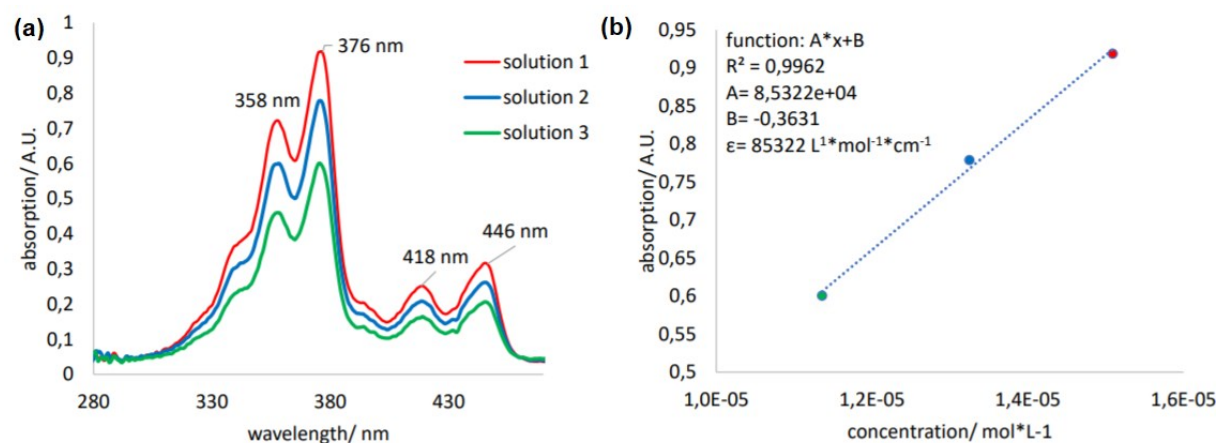

**Figure S4.** a) UV-Vis spectra of **2f** in dichloromethane in four different concentrations; b) corresponding linear regression of the absorbances for the determination of the molar decadic attenuation coefficient ( $\epsilon$ ).

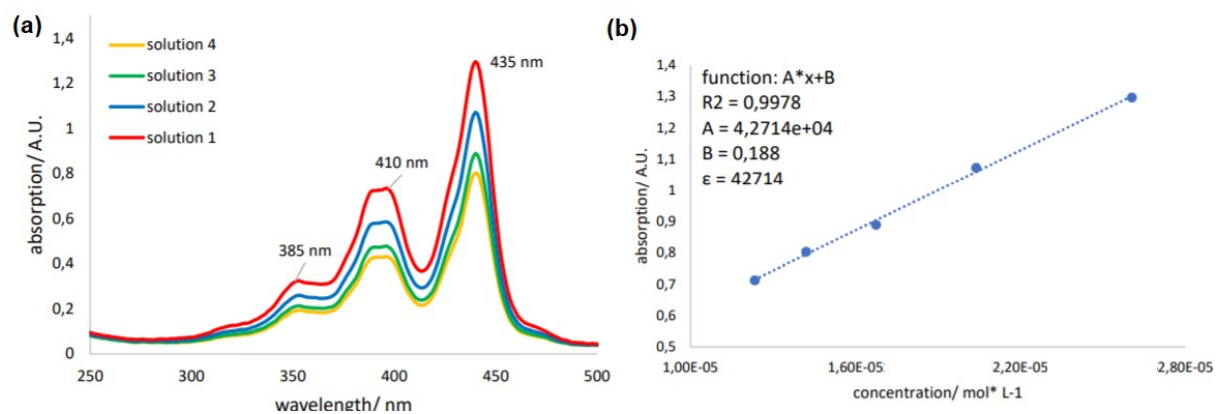

**Figure S5.** a) UV-Vis spectra of **3b** in dichloromethane in four different concentrations; b) corresponding linear regression of the absorbances for the determination of the molar decadic attenuation coefficient ( $\epsilon$ ).

## UV-Vis spectra in different solvents

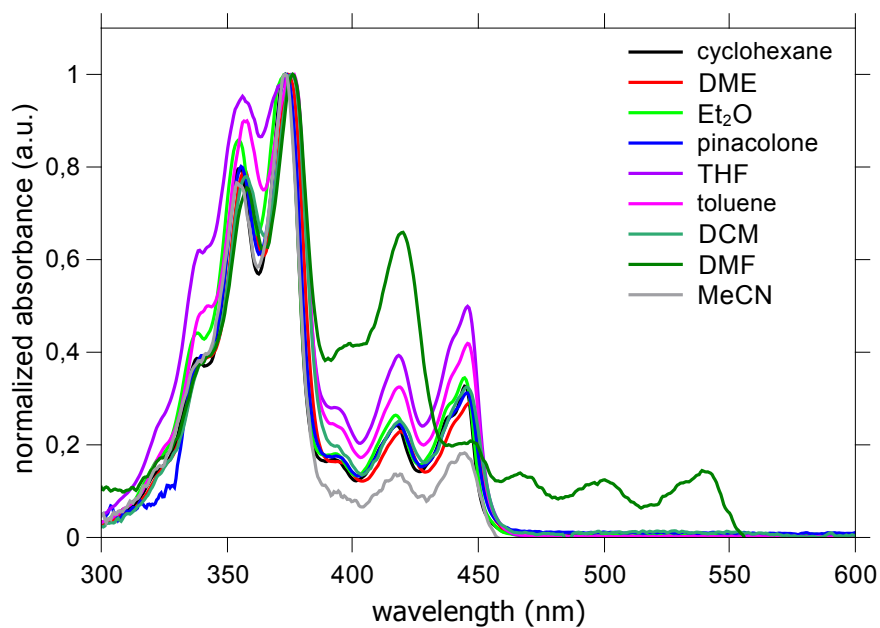

Figure S6. a) Normalized UV-Vis spectra of **2f** recorded in different solvents ( $c \approx 10^{-5}$  M). Note that **2f** decomposes in DMF.

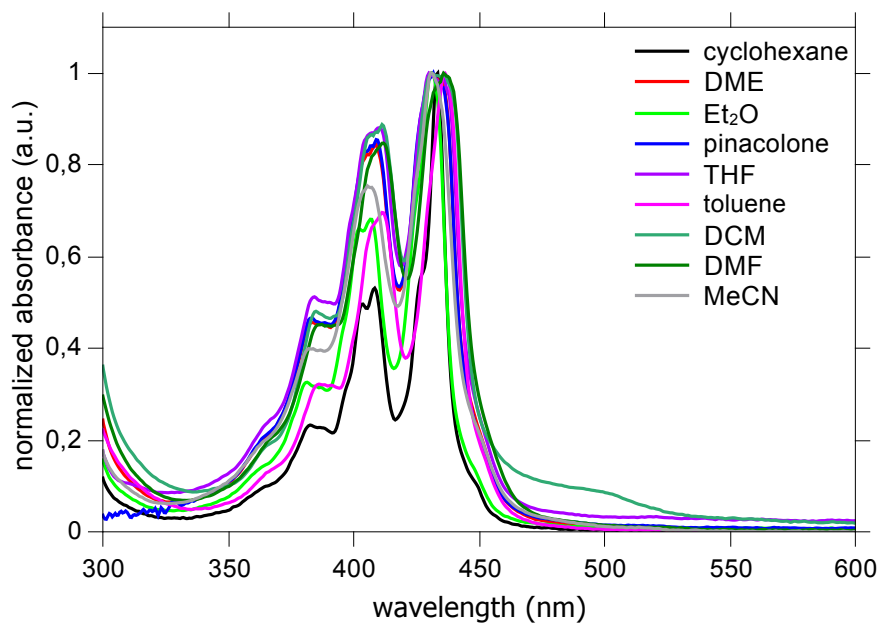

Figure S7. a) Normalized UV-Vis spectra of **3b** recorded in different solvents ( $c \approx 10^{-5}$  M).

## Determination of fluorescence quantum yields

Fluorescence quantum yields ( $\Phi_{\text{PL}}$ ) were recorded by dilution method using a fluorescein solution (0.1 M in aqueous NaOH,  $\Phi_{\text{flu}} = 0.95^1$ ) as reference. Both, the samples and the reference were measured at low concentrations in order to ensure a linear relationship between the intensity of emitted light and the concentration of the absorbing/emitting species.

The quantum yields of the samples ( $\Phi_{\text{s}}$ ) were determined by the following equation 1.<sup>1</sup>

$$\Phi_{\text{flu}} = \frac{\text{grad}(s)}{\text{grad}(\text{flu})} * \frac{n^2(s)}{n^2(\text{flu})} * \Phi_{\text{flu}}$$

In equation 1, *grad* is the slope of the “emission versus absorbance” plot of the samples (s) and the standard fluorescein (flu). *n* is the refractive index of the used solvents.

In the following Figure S7, the “emission versus absorbance” plots and the linear regression graphs for the determination of the fluorescence quantum yields of **2d**, **2f**, **3b**, **3c** as well as the reference fluorescein are shown.

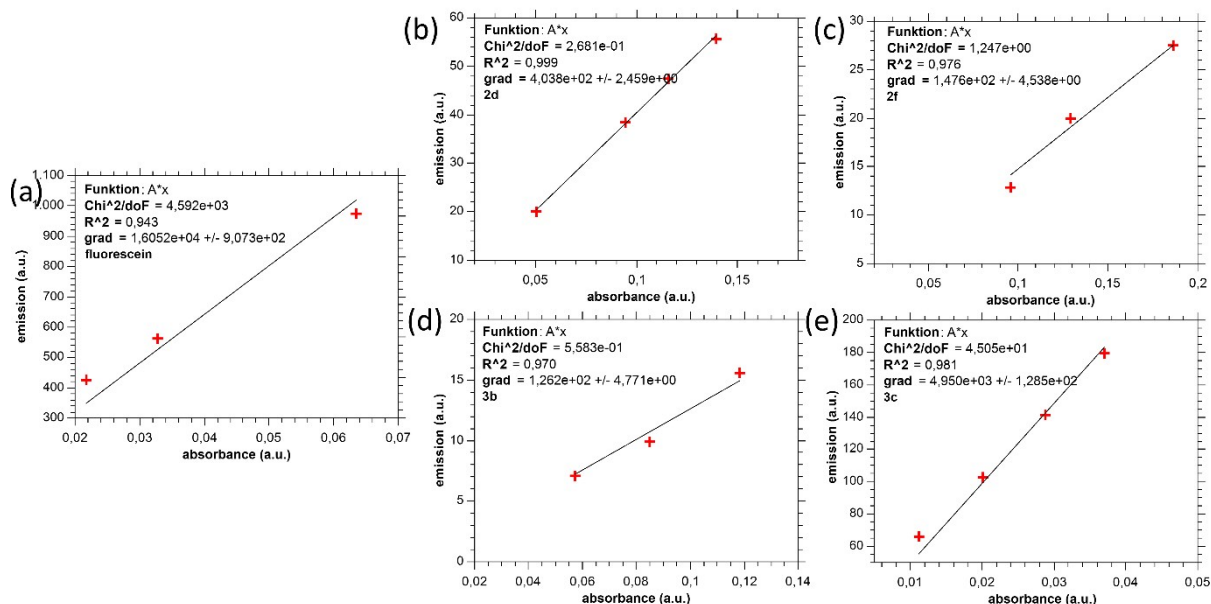

**Figure S8.** “Emission versus absorption” plots of (a) fluorescein (in 0.1 M NaOH solution); (b) **2d**; (c) **2f**; (d) **3b**; (e) **3c** recorded in dichloromethane. The concentrations were in the low  $10^{-6}$  M range.

1 J. R. Lakowicz, *Principles of fluorescence spectroscopy*, Springer, New York, NY, 4th edn., 2010.



# Single crystal X-ray structures

## Crystal Data

|                                              | 1,3,6,8-Tetrakis(trimethylsilyloxy)benzo[ <i>lmn</i> ][3,8]phenanthroline (2a)                | 1,3,6,8-Tetrakis(tert-butyl dimethylsilyloxy)benzo[ <i>lmn</i> ][3,8]phenanthroline (2f)                       | 1,3,6,8-Tetrakis(trimethylsilyl)ethynylbenzo[ <i>lmn</i> ][3,8]phenanthroline (3b)             |
|----------------------------------------------|-----------------------------------------------------------------------------------------------|----------------------------------------------------------------------------------------------------------------|------------------------------------------------------------------------------------------------|
| CCDC code                                    | 2087066                                                                                       | 2087065                                                                                                        | 2087067                                                                                        |
| Identification code                          | swp213loesen                                                                                  | kbv4loesen                                                                                                     | swp162gloesen                                                                                  |
| Empirical formula                            | C <sub>26</sub> H <sub>40</sub> N <sub>2</sub> O <sub>4</sub> Si <sub>4</sub>                 | C <sub>42</sub> H <sub>72</sub> N <sub>2</sub> O <sub>6</sub> Si <sub>4</sub>                                  | C <sub>18</sub> H <sub>21</sub> Cl <sub>3</sub> N Si <sub>2</sub>                              |
| Formula weight                               | 556.96 g/mol                                                                                  | 813.37 g/mol                                                                                                   | 413.89 g/mol                                                                                   |
| Temperature                                  | 100(2) K                                                                                      | 100(2) K                                                                                                       | 100(2) K                                                                                       |
| Wavelength                                   | 1.54186 Å                                                                                     | 1.54186 Å                                                                                                      | 1.54186 Å                                                                                      |
| Crystal system                               | Monoclinic                                                                                    | Triclinic                                                                                                      | Monoclinic                                                                                     |
| Space group                                  | <i>P</i> 2 <sub>1</sub> / <i>n</i>                                                            | <i>P</i> -1                                                                                                    | <i>P</i> 2 <sub>1</sub> / <i>n</i>                                                             |
| Unit cell dimensions                         | a = 11.258(2) Å<br>b = 11.167(2) Å<br>c = 13.919(3) Å<br>α = 90°<br>β = 113.25(3)°<br>γ = 90° | a = 7.8672(2) Å<br>b = 11.2136(3) Å<br>c = 13.7228(3) Å<br>α = 95.577(2)°<br>β = 100.951(2)°<br>γ = 96.686(2)° | a = 6.3490(13) Å<br>b = 22.215(4) Å<br>c = 15.599(3) Å<br>α = 90°<br>β = 101.54(3)°<br>γ = 90° |
| Volume                                       | 1607.7(6) Å <sup>3</sup>                                                                      | 2893.0(4) Å <sup>3</sup>                                                                                       | 2155.7(8) Å <sup>3</sup>                                                                       |
| Z                                            | 2                                                                                             | 1                                                                                                              | 4                                                                                              |
| Density (calculated)                         | 1.151 g/cm <sup>3</sup>                                                                       | 1.153 g/cm <sup>3</sup>                                                                                        | 1.275 g/cm <sup>3</sup>                                                                        |
| Absorption coefficient                       | 1.966 mm <sup>-1</sup>                                                                        | 1.525 mm <sup>-1</sup>                                                                                         | 4.911 mm <sup>-1</sup>                                                                         |
| F(000)                                       | 596                                                                                           | 422                                                                                                            | 860                                                                                            |
| Crystal size                                 | 0.307x0.169x0.074 mm <sup>3</sup>                                                             | 0.235x0.168x0.110 mm <sup>3</sup>                                                                              | 0.307x0.169x0.074 mm <sup>3</sup>                                                              |
| Theta range for data collection              | 3.979 to 69.993°                                                                              | 3.999 to 66.493°                                                                                               | 3.510 to 66.595°                                                                               |
| Index ranges                                 | <i>h</i> = -13 $\bar{y}$ 13, <i>k</i> = -12 $\bar{y}$ 13, <i>l</i> = -16 $\bar{y}$ 13         | <i>h</i> = -16 $\bar{y}$ 16, <i>k</i> = -18 $\bar{y}$ 16, <i>l</i> = -17 $\bar{y}$ 18                          | <i>h</i> = -7 $\bar{y}$ 7, <i>k</i> = -26 $\bar{y}$ 26, <i>l</i> = -18 $\bar{y}$ 9             |
| Reflections collected                        | 56597                                                                                         | 19390                                                                                                          | 23677                                                                                          |
| Independent reflections                      | 34488 [R(int) = 0.0341]                                                                       | 4077 [R(int) = 0.0292]                                                                                         | 3803 [R(int) = 0.0482]                                                                         |
| Completeness to theta = x                    | 100% (x = 66.45°)                                                                             | 95.5% (x = 66.50°)                                                                                             | 99.4% (x = 66.60°)                                                                             |
| Absorption correction                        | Semi-empirical from equivalents                                                               | Semi-empirical from equivalents                                                                                | Semi-empirical from equivalents                                                                |
| Max. and min. transmission                   | 0.1859 and 0.3540                                                                             | 0.2514 and 0.6611                                                                                              | 0.3254 and 1.0000                                                                              |
| Refinement method                            | Full-matrix least-squares on F <sup>2</sup>                                                   | Full-matrix least-squares on F <sup>2</sup>                                                                    | Full-matrix least-squares on F <sup>2</sup>                                                    |
| Data / restraints / parameters               | 56597 / 0 / 171                                                                               | 4077 / 0 / 254                                                                                                 | 3803 / 0 / 223                                                                                 |
| Goodness-of-fit on F <sup>2</sup>            | 1.026                                                                                         | 1.067                                                                                                          | 1.056                                                                                          |
| Final R indices [ <i>I</i> > 2σ( <i>I</i> )] | R <sub>1</sub> = 0.0718, wR <sub>2</sub> = 0.2146                                             | R <sub>1</sub> = 0.0459, wR <sub>2</sub> = 0.1303                                                              | R <sub>1</sub> = 0.0474, wR <sub>2</sub> = 0.1311                                              |
| R indices (all data)                         | R <sub>1</sub> = 0.0994, wR <sub>2</sub> = 0.2526                                             | R <sub>1</sub> = 0.0491, wR <sub>2</sub> = 0.1328                                                              | R <sub>1</sub> = 0.0555, wR <sub>2</sub> = 0.1376                                              |
| Extinction coefficient                       | n/a                                                                                           | n/a                                                                                                            | n/a                                                                                            |
| Largest diff. peak and hole                  | 0.560 and -0.416 e <sup>-</sup> Å <sup>-3</sup>                                               | 0.214 and -0.370 e <sup>-</sup> Å <sup>-3</sup>                                                                | 0.374 and -0.476 e <sup>-</sup> Å <sup>-3</sup>                                                |



## Molecular structures of the title compounds

### 1,3,6,8-Tetrakis(trimethylsilyloxy)benzo[*lmn*][3,8]phenanthroline (**2a**)

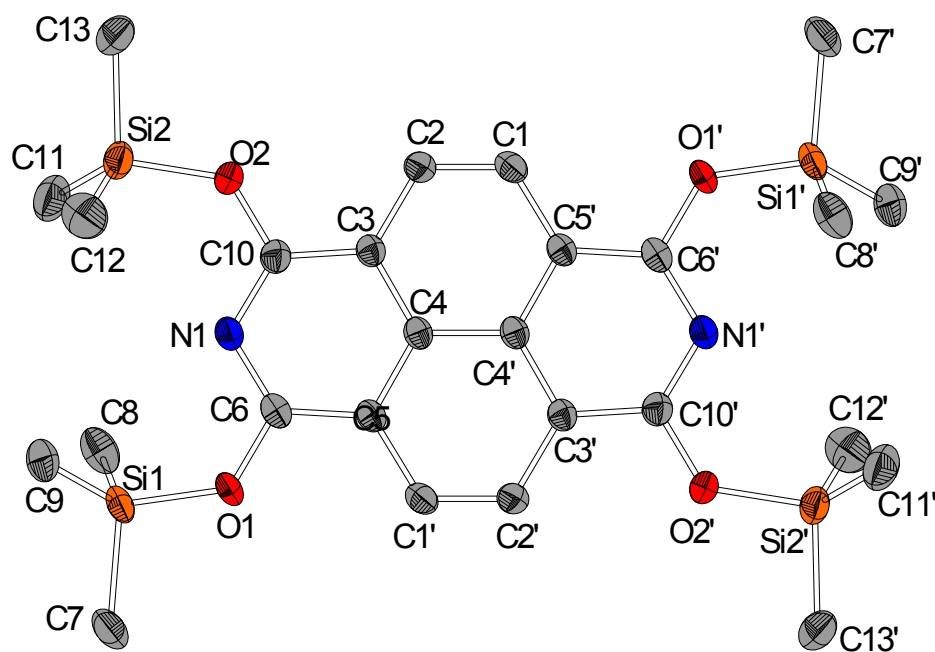

**Figure S9.** Reduced cell of the crystallographically determined molecular structure of **2a**. Protons are not shown. Symmetry transformations: 2 -x, 1-y, 1-z.

**Table S7.** Bond lengths [Å] and angles [°] **2a**.

|                   |            |
|-------------------|------------|
| Si(1)-O(1)        | 1.685(3)   |
| Si(1)-C(8)        | 1.847(5)   |
| Si(1)-C(7)        | 1.848(4)   |
| Si(1)-C(9)        | 1.848(4)   |
| Si(2)-O(2)        | 1.675(3)   |
| Si(2)-C(11)       | 1.849(5)   |
| Si(2)-C(12)       | 1.849(5)   |
| Si(2)-C(13)       | 1.855(4)   |
| O(1)-C(6)         | 1.348(4)   |
| O(2)-C(10)        | 1.350(4)   |
| N(1)-C(10)        | 1.333(4)   |
| N(1)-C(6)         | 1.339(5)   |
| C(1)-C(2)         | 1.350(5)   |
| C(1)-C(5)#1       | 1.436(5)   |
| C(2)-C(3)         | 1.437(5)   |
| C(3)-C(10)        | 1.405(5)   |
| C(3)-C(4)         | 1.410(5)   |
| C(4)-C(5)         | 1.413(5)   |
| C(4)-C(4)#1       | 1.425(6)   |
| C(5)-C(6)         | 1.404(5)   |
| O(1)-Si(1)-C(8)   | 108.87(16) |
| O(1)-Si(1)-C(7)   | 103.08(17) |
| C(8)-Si(1)-C(7)   | 111.4(2)   |
| O(1)-Si(1)-C(9)   | 111.28(18) |
| C(8)-Si(1)-C(9)   | 111.9(2)   |
| C(7)-Si(1)-C(9)   | 109.97(19) |
| O(2)-Si(2)-C(11)  | 109.59(18) |
| O(2)-Si(2)-C(12)  | 109.6(2)   |
| C(11)-Si(2)-C(12) | 113.6(2)   |

|                   |            |
|-------------------|------------|
| O(2)-Si(2)-C(13)  | 101.39(17) |
| C(11)-Si(2)-C(13) | 111.4(2)   |
| C(12)-Si(2)-C(13) | 110.6(2)   |
| C(6)-O(1)-Si(1)   | 128.3(3)   |
| C(10)-O(2)-Si(2)  | 130.1(2)   |
| C(10)-N(1)-C(6)   | 118.1(3)   |
| C(2)-C(1)-C(5)#1  | 121.0(3)   |
| C(1)-C(2)-C(3)    | 120.5(3)   |
| C(10)-C(3)-C(4)   | 116.2(3)   |
| C(10)-C(3)-C(2)   | 123.9(3)   |
| C(4)-C(3)-C(2)    | 119.8(3)   |
| C(3)-C(4)-C(5)    | 120.8(3)   |
| C(3)-C(4)-C(4)#1  | 119.5(4)   |
| C(5)-C(4)-C(4)#1  | 119.7(4)   |
| C(6)-C(5)-C(4)    | 116.3(3)   |
| C(6)-C(5)-C(1)#1  | 124.2(3)   |
| C(4)-C(5)-C(1)#1  | 119.4(3)   |
| N(1)-C(6)-O(1)    | 118.3(3)   |
| N(1)-C(6)-C(5)    | 124.1(3)   |
| O(1)-C(6)-C(5)    | 117.5(3)   |
| N(1)-C(10)-O(2)   | 118.5(3)   |
| N(1)-C(10)-C(3)   | 124.4(3)   |
| O(2)-C(10)-C(3)   | 117.0(3)   |

Symmetry transformations used to generate equivalent atoms:

#2 -x, 1-y, 1-z.

1,3,6,8-Tetrakis((tert-butyl)dimethylsilyloxy)benzo[lmn][3,8]phenanthroline (**2f**)

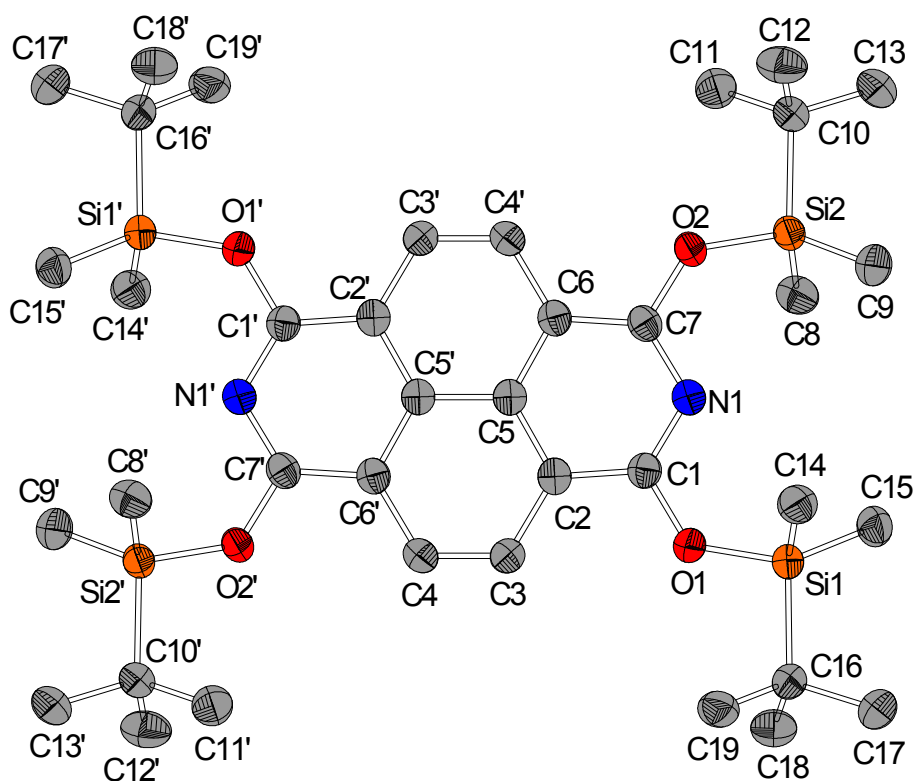

**Figure S10.** Reduced cell of the crystallographically determined molecular structure of **2f**. Protons are not shown. Symmetry transformations: 1 -x+1,-y+1,-z+1 and 2 -x+2,-y,-z+1.

**Table S8.** Bond lengths [Å] and angles [°] **2f**.

|                   |            |
|-------------------|------------|
| Si(1)-O(1)        | 1.6809(12) |
| Si(1)-C(14)       | 1.8536(19) |
| Si(1)-C(15)       | 1.8588(18) |
| Si(1)-C(16)       | 1.8741(18) |
| Si(2)-O(2)        | 1.6824(12) |
| Si(2)-C(8)        | 1.8516(19) |
| Si(2)-C(9)        | 1.8543(18) |
| Si(2)-C(10)       | 1.8753(18) |
| O(1)-C(1)         | 1.357(2)   |
| O(2)-C(7)         | 1.353(2)   |
| O(3)-C(21)        | 1.378(3)   |
| O(3)-C(20)        | 1.439(3)   |
| N(1)-C(1)         | 1.331(2)   |
| N(1)-C(7)         | 1.337(2)   |
| C(1)-C(2)         | 1.406(2)   |
| C(2)-C(5)         | 1.412(2)   |
| C(2)-C(3)         | 1.433(2)   |
| C(3)-C(4)         | 1.356(2)   |
| C(4)-C(6)#1       | 1.435(2)   |
| C(5)-C(6)         | 1.413(2)   |
| C(5)-C(5)#1       | 1.431(3)   |
| C(6)-C(7)         | 1.404(2)   |
| C(10)-C(12)       | 1.536(3)   |
| C(10)-C(13)       | 1.538(2)   |
| C(10)-C(11)       | 1.539(3)   |
| C(16)-C(17)       | 1.533(2)   |
| C(16)-C(18)       | 1.536(3)   |
| C(16)-C(19)       | 1.538(2)   |
| C(20)-C(21)#2     | 1.526(3)   |
| O(1)-Si(1)-C(14)  | 110.39(8)  |
| O(1)-Si(1)-C(15)  | 110.90(8)  |
| C(14)-Si(1)-C(15) | 110.56(9)  |
| O(1)-Si(1)-C(16)  | 102.18(7)  |
| C(14)-Si(1)-C(16) | 111.32(9)  |
| C(15)-Si(1)-C(16) | 111.23(9)  |
| O(2)-Si(2)-C(8)   | 108.67(7)  |
| O(2)-Si(2)-C(9)   | 109.94(8)  |
| C(8)-Si(2)-C(9)   | 111.91(9)  |
| O(2)-Si(2)-C(10)  | 103.12(7)  |
| C(8)-Si(2)-C(10)  | 111.37(9)  |
| C(9)-Si(2)-C(10)  | 111.44(9)  |
| C(1)-O(1)-Si(1)   | 128.80(11) |
| C(7)-O(2)-Si(2)   | 125.81(11) |
| C(21)-O(3)-C(20)  | 111.67(18) |
| C(1)-N(1)-C(7)    | 118.04(14) |
| N(1)-C(1)-O(1)    | 117.65(14) |
| N(1)-C(1)-C(2)    | 124.66(16) |
| O(1)-C(1)-C(2)    | 117.69(15) |
| C(1)-C(2)-C(5)    | 115.78(16) |
| C(1)-C(2)-C(3)    | 124.34(16) |
| C(5)-C(2)-C(3)    | 119.84(15) |
| C(4)-C(3)-C(2)    | 120.62(16) |
| C(3)-C(4)-C(6)#1  | 120.77(16) |
| C(2)-C(5)-C(6)    | 121.09(16) |
| C(2)-C(5)-C(5)#1  | 119.64(19) |
| C(6)-C(5)-C(5)#1  | 119.3(2)   |
| C(7)-C(6)-C(5)    | 116.05(16) |
| C(7)-C(6)-C(4)#1  | 124.09(16) |
| C(5)-C(6)-C(4)#1  | 119.85(15) |
| N(1)-C(7)-O(2)    | 117.54(14) |

|                    |            |
|--------------------|------------|
| N(1)-C(7)-C(6)     | 124.32(16) |
| O(2)-C(7)-C(6)     | 118.15(16) |
| C(12)-C(10)-C(13)  | 109.35(16) |
| C(12)-C(10)-C(11)  | 108.90(17) |
| C(13)-C(10)-C(11)  | 108.57(16) |
| C(12)-C(10)-Si(2)  | 109.84(13) |
| C(13)-C(10)-Si(2)  | 109.99(13) |
| C(11)-C(10)-Si(2)  | 110.16(13) |
| C(17)-C(16)-C(18)  | 108.76(16) |
| C(17)-C(16)-C(19)  | 108.92(16) |
| C(18)-C(16)-C(19)  | 108.38(15) |
| C(17)-C(16)-Si(1)  | 109.57(13) |
| C(18)-C(16)-Si(1)  | 110.75(13) |
| C(19)-C(16)-Si(1)  | 110.42(12) |
| O(3)-C(20)-C(21)#2 | 111.18(18) |
| O(3)-C(21)-C(20)#2 | 109.81(18) |

Symmetry transformations used to generate equivalent atoms:

#1 -x+1,-y+1,-z+1 #2 -x+2,-y,-z+1

1,3,6,8-Tetrakis((trimethylsilyl)ethynyl)benzo[*lmn*][3,8]phenanthroline (**3b**)

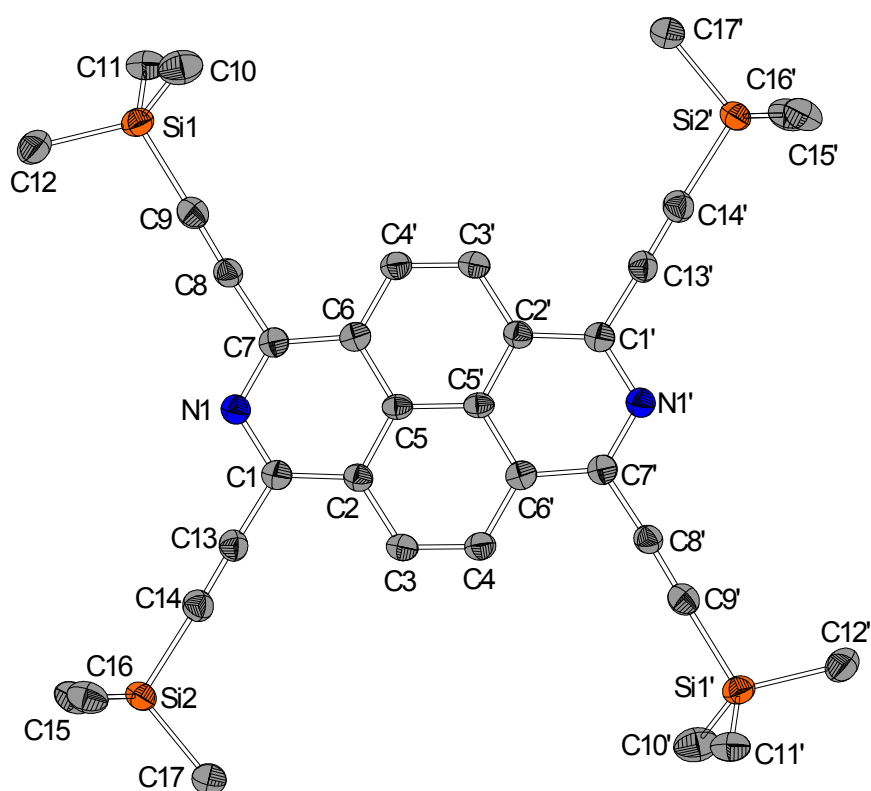

**Figure S11.** Reduced cell of the crystallographically determined molecular structure of **3b**. Protons are not shown. Symmetry transformations: 2-x, 1-y, 1-z.

**Table S9.** Bond lengths [Å] and angles [°] **3b**.

|            |          |
|------------|----------|
| C(1)-N(1)  | 1.341(3) |
| C(1)-C(2)  | 1.414(3) |
| C(1)-C(13) | 1.438(4) |
| C(2)-C(5)  | 1.411(3) |
| C(2)-C(3)  | 1.428(4) |
| C(3)-C(4)  | 1.360(4) |

|                  |          |
|------------------|----------|
| C(3)-H(3)        | 0.9300   |
| C(4)-C(6)#1      | 1.426(4) |
| C(4)-H(4)        | 0.9300   |
| C(5)-C(6)        | 1.418(3) |
| C(5)-C(5)#1      | 1.420(5) |
| C(6)-C(7)        | 1.414(3) |
| C(7)-N(1)        | 1.349(3) |
| C(7)-C(8)        | 1.442(4) |
| C(8)-C(9)        | 1.207(4) |
| C(9)-Si(1)       | 1.844(3) |
| C(10)-Si(1)      | 1.862(3) |
| C(10)-H(10A)     | 0.9600   |
| C(10)-H(10B)     | 0.9600   |
| C(10)-H(10C)     | 0.9600   |
| C(11)-Si(1)      | 1.862(3) |
| C(11)-H(11A)     | 0.9600   |
| C(11)-H(11B)     | 0.9600   |
| C(11)-H(11C)     | 0.9600   |
| C(12)-Si(1)      | 1.859(3) |
| C(12)-H(12A)     | 0.9600   |
| C(12)-H(12B)     | 0.9600   |
| C(12)-H(12C)     | 0.9600   |
| C(13)-C(14)      | 1.212(4) |
| C(14)-Si(2)      | 1.850(3) |
| C(15)-Si(2)      | 1.856(3) |
| C(15)-H(15A)     | 0.9600   |
| C(15)-H(15B)     | 0.9600   |
| C(15)-H(15C)     | 0.9600   |
| C(16)-Si(2)      | 1.858(3) |
| C(16)-H(16A)     | 0.9600   |
| C(16)-H(16B)     | 0.9600   |
| C(16)-H(16C)     | 0.9600   |
| C(17)-Si(2)      | 1.862(3) |
| C(17)-H(17A)     | 0.9600   |
| C(17)-H(17B)     | 0.9600   |
| C(17)-H(17C)     | 0.9600   |
| C(18)-Cl(3)      | 1.746(3) |
| C(18)-Cl(1)      | 1.760(3) |
| C(18)-Cl(2)      | 1.763(3) |
| C(18)-H(18)      | 0.9800   |
|                  |          |
| N(1)-C(1)-C(2)   | 123.5(2) |
| N(1)-C(1)-C(13)  | 116.6(2) |
| C(2)-C(1)-C(13)  | 119.9(2) |
| C(5)-C(2)-C(1)   | 117.3(2) |
| C(5)-C(2)-C(3)   | 119.0(2) |
| C(1)-C(2)-C(3)   | 123.7(2) |
| C(4)-C(3)-C(2)   | 121.1(2) |
| C(4)-C(3)-H(3)   | 119.5    |
| C(2)-C(3)-H(3)   | 119.5    |
| C(3)-C(4)-C(6)#1 | 121.0(2) |
| C(3)-C(4)-H(4)   | 119.5    |
| C(6)#1-C(4)-H(4) | 119.5    |
| C(2)-C(5)-C(6)   | 120.2(2) |
| C(2)-C(5)-C(5)#1 | 120.3(3) |
| C(6)-C(5)-C(5)#1 | 119.5(3) |
| C(7)-C(6)-C(5)   | 116.7(2) |
| C(7)-C(6)-C(4)#1 | 124.1(2) |
| C(5)-C(6)-C(4)#1 | 119.2(2) |
| N(1)-C(7)-C(6)   | 123.8(2) |
| N(1)-C(7)-C(8)   | 117.3(2) |
| C(6)-C(7)-C(8)   | 119.0(2) |
| C(9)-C(8)-C(7)   | 177.0(3) |

|                     |            |
|---------------------|------------|
| C(8)-C(9)-Si(1)     | 177.5(2)   |
| Si(1)-C(10)-H(10A)  | 109.5      |
| Si(1)-C(10)-H(10B)  | 109.5      |
| H(10A)-C(10)-H(10B) | 109.5      |
| Si(1)-C(10)-H(10C)  | 109.5      |
| H(10A)-C(10)-H(10C) | 109.5      |
| H(10B)-C(10)-H(10C) | 109.5      |
| Si(1)-C(11)-H(11A)  | 109.5      |
| Si(1)-C(11)-H(11B)  | 109.5      |
| H(11A)-C(11)-H(11B) | 109.5      |
| Si(1)-C(11)-H(11C)  | 109.5      |
| H(11A)-C(11)-H(11C) | 109.5      |
| H(11B)-C(11)-H(11C) | 109.5      |
| Si(1)-C(12)-H(12A)  | 109.5      |
| Si(1)-C(12)-H(12B)  | 109.5      |
| H(12A)-C(12)-H(12B) | 109.5      |
| Si(1)-C(12)-H(12C)  | 109.5      |
| H(12A)-C(12)-H(12C) | 109.5      |
| H(12B)-C(12)-H(12C) | 109.5      |
| C(14)-C(13)-C(1)    | 177.9(3)   |
| C(13)-C(14)-Si(2)   | 175.2(2)   |
| Si(2)-C(15)-H(15A)  | 109.5      |
| Si(2)-C(15)-H(15B)  | 109.5      |
| H(15A)-C(15)-H(15B) | 109.5      |
| Si(2)-C(15)-H(15C)  | 109.5      |
| H(15A)-C(15)-H(15C) | 109.5      |
| H(15B)-C(15)-H(15C) | 109.5      |
| Si(2)-C(16)-H(16A)  | 109.5      |
| Si(2)-C(16)-H(16B)  | 109.5      |
| H(16A)-C(16)-H(16B) | 109.5      |
| Si(2)-C(16)-H(16C)  | 109.5      |
| H(16A)-C(16)-H(16C) | 109.5      |
| H(16B)-C(16)-H(16C) | 109.5      |
| Si(2)-C(17)-H(17A)  | 109.5      |
| Si(2)-C(17)-H(17B)  | 109.5      |
| H(17A)-C(17)-H(17B) | 109.5      |
| Si(2)-C(17)-H(17C)  | 109.5      |
| H(17A)-C(17)-H(17C) | 109.5      |
| H(17B)-C(17)-H(17C) | 109.5      |
| Cl(3)-C(18)-Cl(1)   | 110.95(16) |
| Cl(3)-C(18)-Cl(2)   | 110.02(15) |
| Cl(1)-C(18)-Cl(2)   | 110.40(16) |
| Cl(3)-C(18)-H(18)   | 108.5      |
| Cl(1)-C(18)-H(18)   | 108.5      |
| Cl(2)-C(18)-H(18)   | 108.5      |
| C(1)-N(1)-C(7)      | 118.5(2)   |
| C(9)-Si(1)-C(12)    | 108.22(13) |
| C(9)-Si(1)-C(10)    | 107.27(14) |
| C(12)-Si(1)-C(10)   | 112.25(16) |
| C(9)-Si(1)-C(11)    | 109.51(13) |
| C(12)-Si(1)-C(11)   | 109.35(15) |
| C(10)-Si(1)-C(11)   | 110.17(14) |
| C(14)-Si(2)-C(15)   | 109.46(13) |
| C(14)-Si(2)-C(16)   | 106.79(13) |
| C(15)-Si(2)-C(16)   | 111.22(14) |
| C(14)-Si(2)-C(17)   | 108.43(13) |
| C(15)-Si(2)-C(17)   | 109.12(14) |
| C(16)-Si(2)-C(17)   | 111.75(15) |

---

Symmetry transformations used to generate equivalent atoms:

#1 -x+2,-y+1,-z+1

# EI-MS spectrum of 1,3,6,8-tetraiodobenzo[*lmn*][3,8]phenanthroline (**11**)

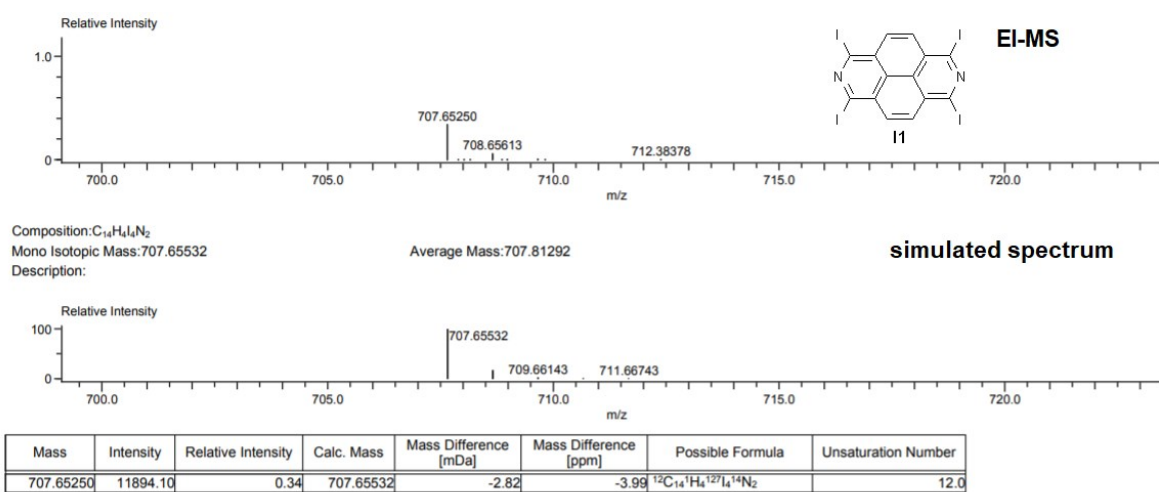

**Figure S12.** High-resolution electron ionization (EI) mass spectrum (top) of **11** and simulated spectrum (below).

## NMR spectra

### 1,3,6,8-Tetrakis(trimethylsilyloxy)benzo[*lmn*][3,8]phenanthroline (**2a**)

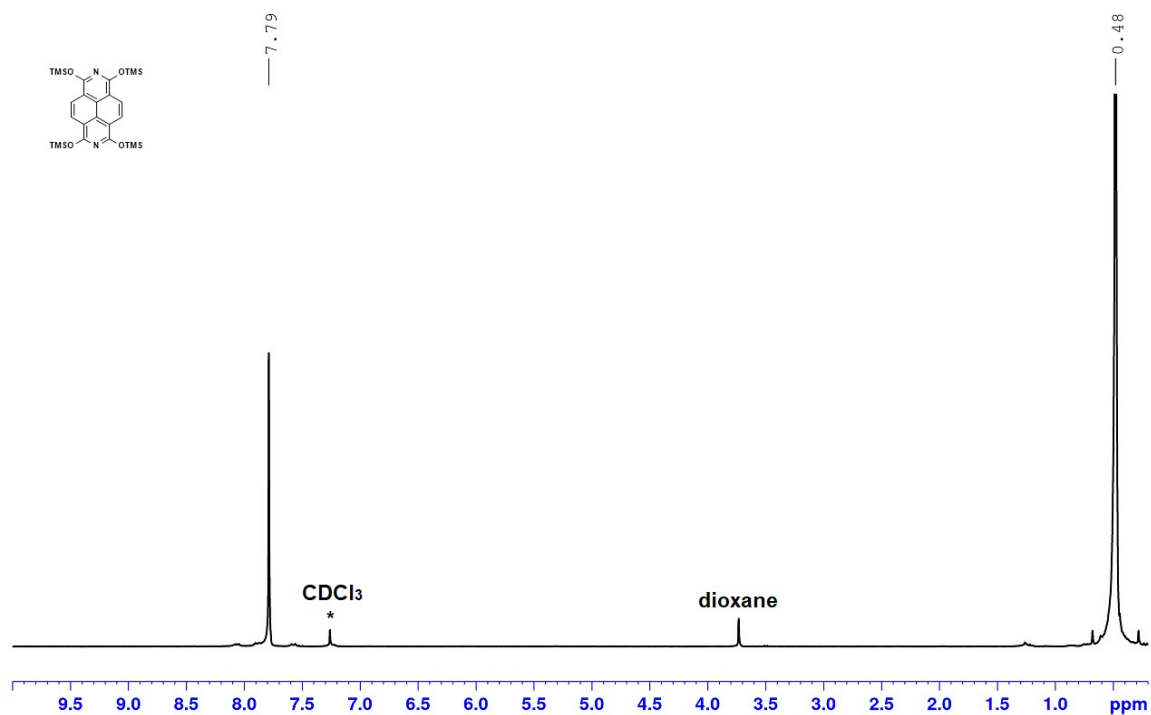

Figure S13.  $^1\text{H-NMR}$  (300.1 MHz, 298K,  $\text{CDCl}_3^*$ ) of **2a**.

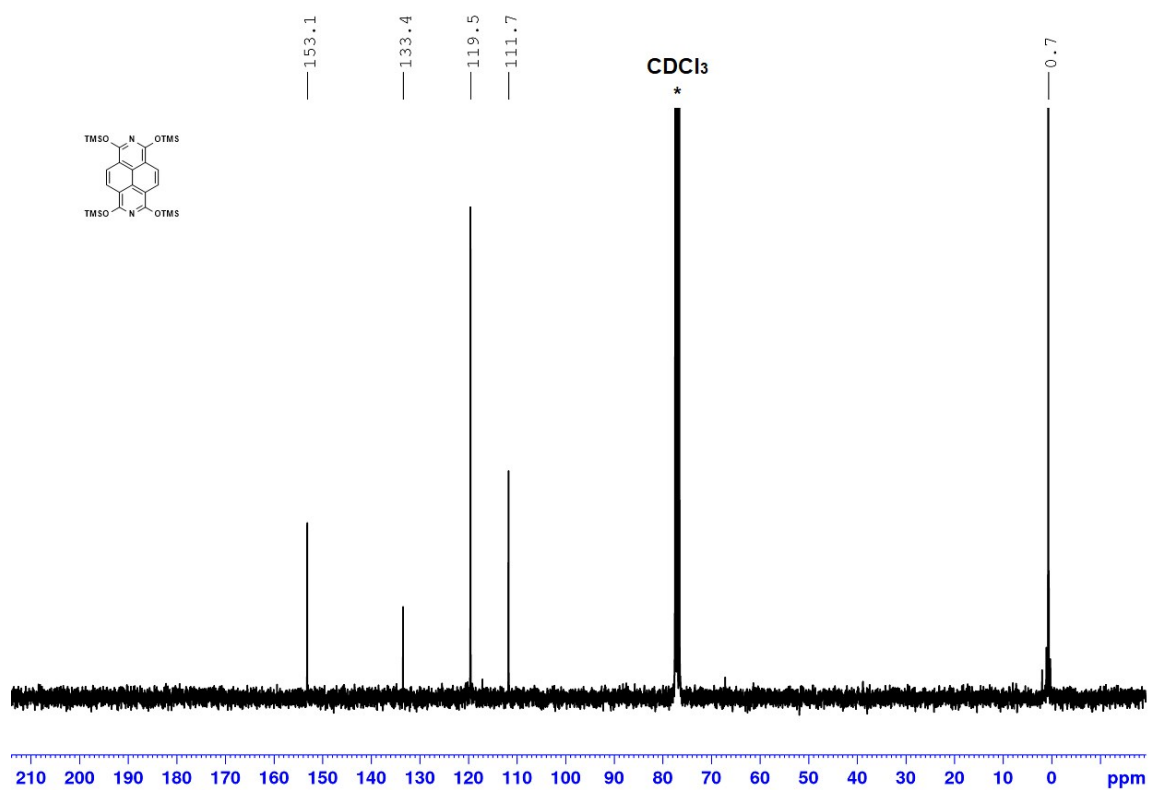

Figure S14.  $^{13}\text{C-NMR}$  (75.1 MHz, 298K,  $\text{CDCl}_3^*$ ) of **2a**.



1,3,6,8-Tetrakis((triisopropylsilyl)oxy)benzo[*lmn*][3,8]phenanthroline (**2e**)

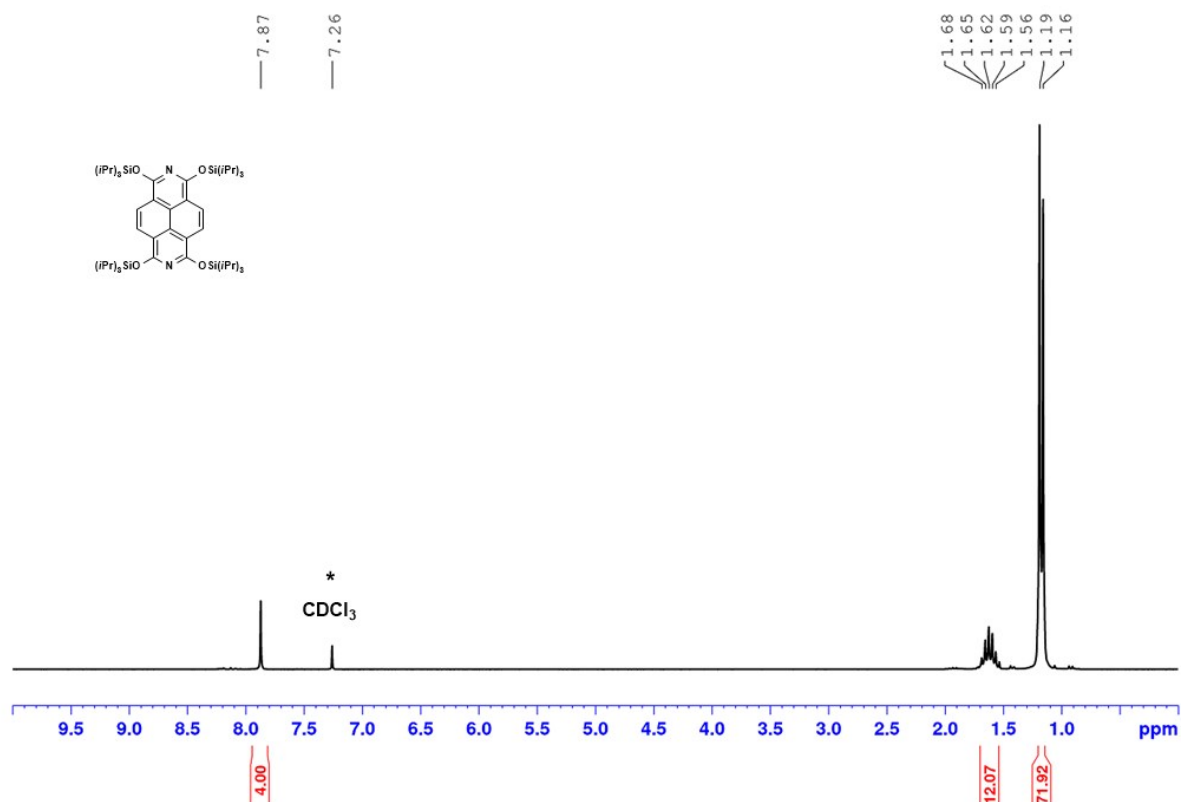

Figure S15. <sup>1</sup>H-NMR (300.1 MHz, 298K, CDCl<sub>3</sub>\*) of **2e**.

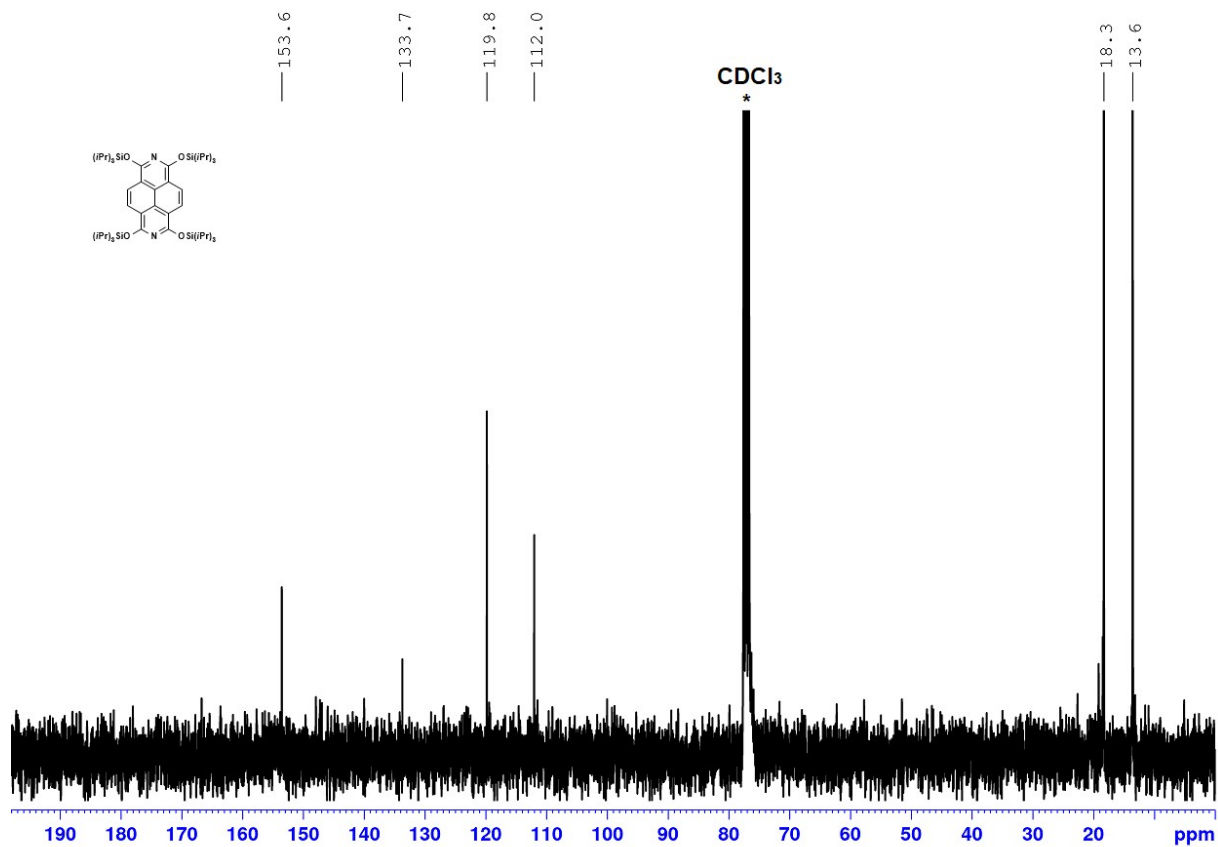

Figure S16. <sup>13</sup>C-NMR (75.1 MHz, 298K, CDCl<sub>3</sub>\*) of **2e**.

1,3,6,8-Tetrakis((tert-butyl)dimethylsilyloxy)benzo[*lmn*][3,8]phenanthroline (**2f**)

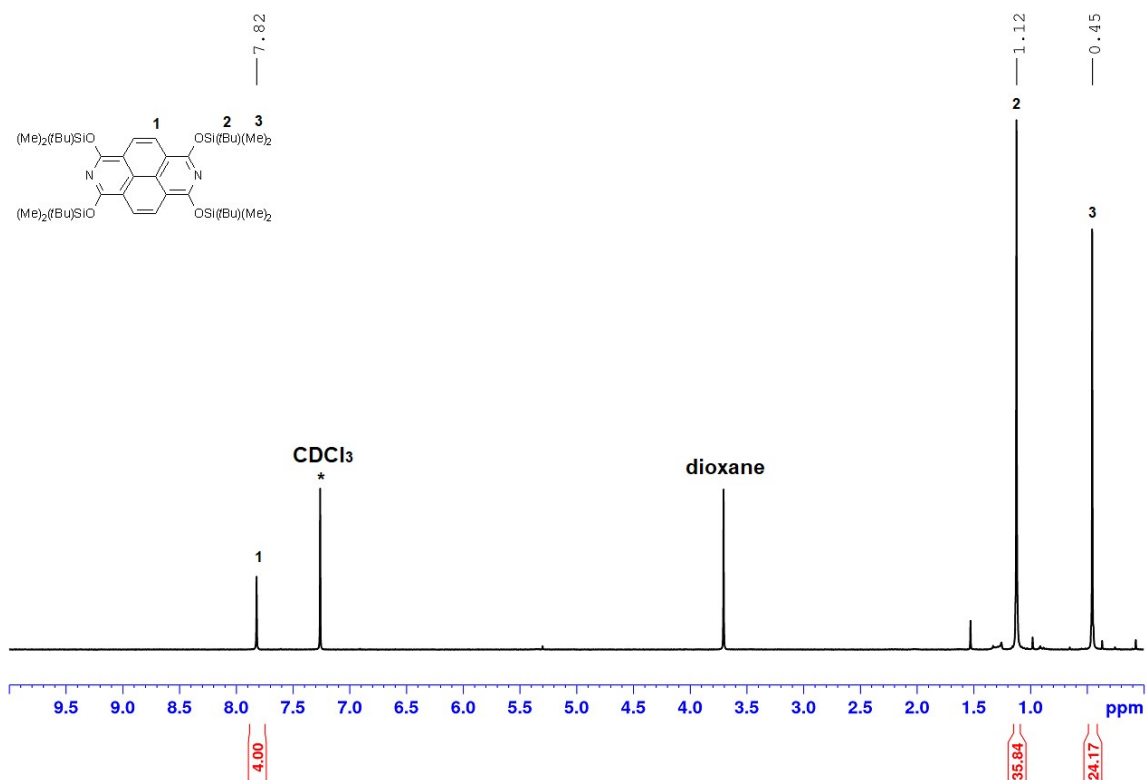

Figure S17. <sup>1</sup>H-NMR (300.1 MHz, 298K, CDCl<sub>3</sub>\*) of **2f**. Contains residual 1,4-dioxane.

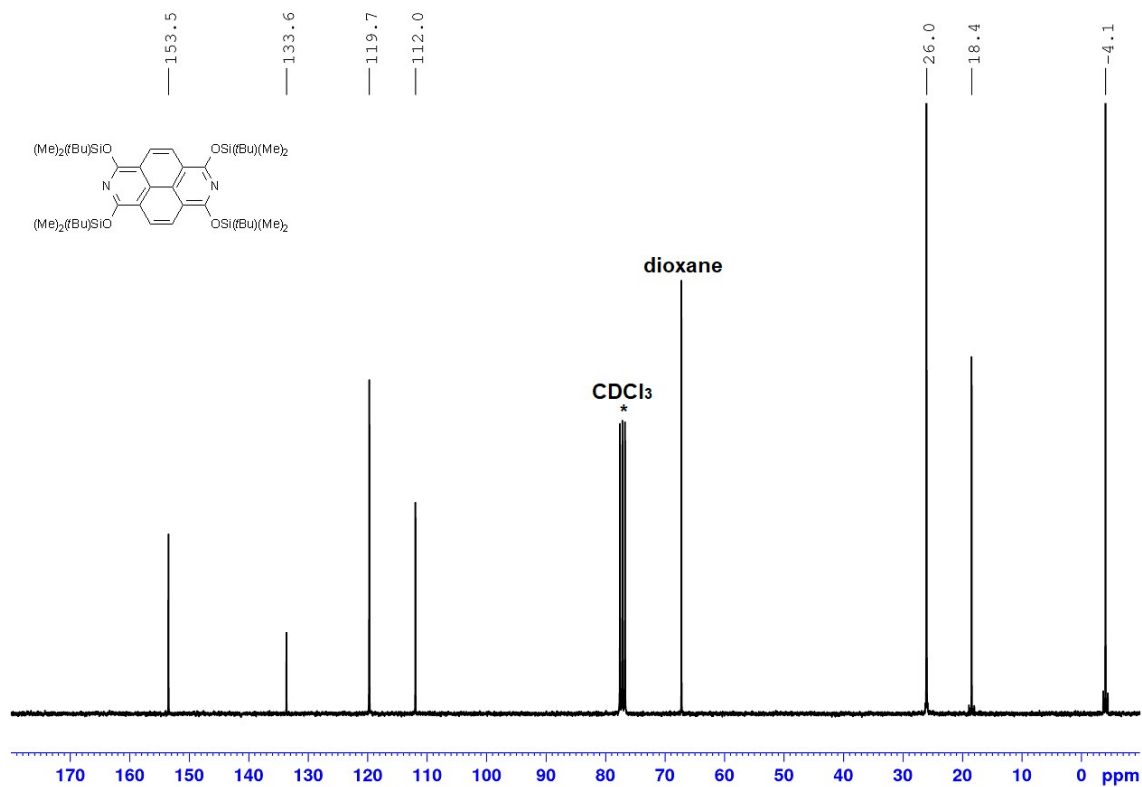

Figure S18. <sup>13</sup>C-NMR (75.1 MHz, 298K, CDCl<sub>3</sub>\*) of **2f**. Contains residual 1,4-dioxane.

Benzo[*lmn*][3,8]phenanthroline-1,3,6,8-tetrayltetrakis(trifluoromethanesulfonate) (**2d**)

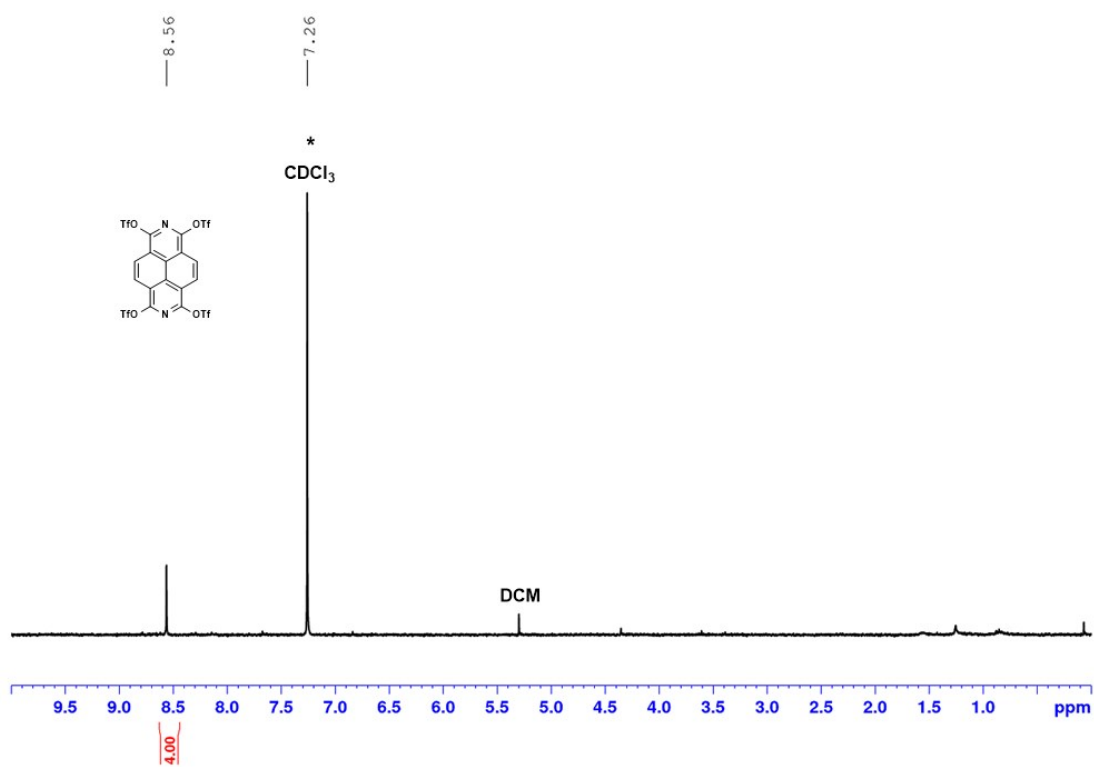

Figure S19. <sup>1</sup>H-NMR (300.1 MHz, 298K, CDCl<sub>3</sub>\*) of **2d**. Contains residual dichloromethane.

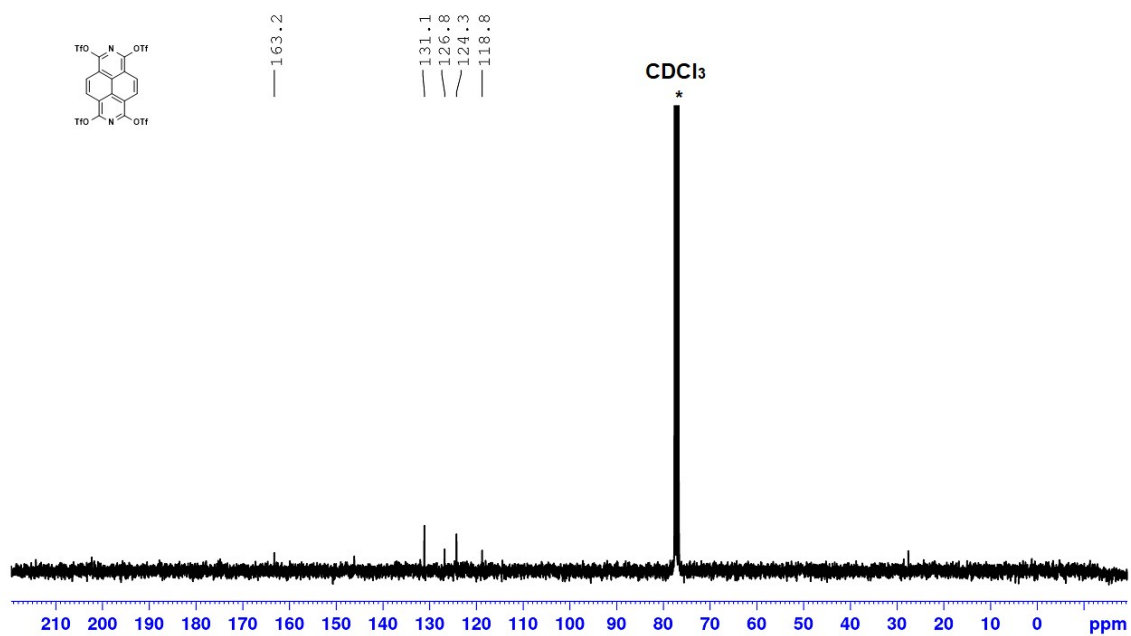

Figure S20. <sup>13</sup>C-NMR (75.1 MHz, 298K, CDCl<sub>3</sub>\*) of **2d**.

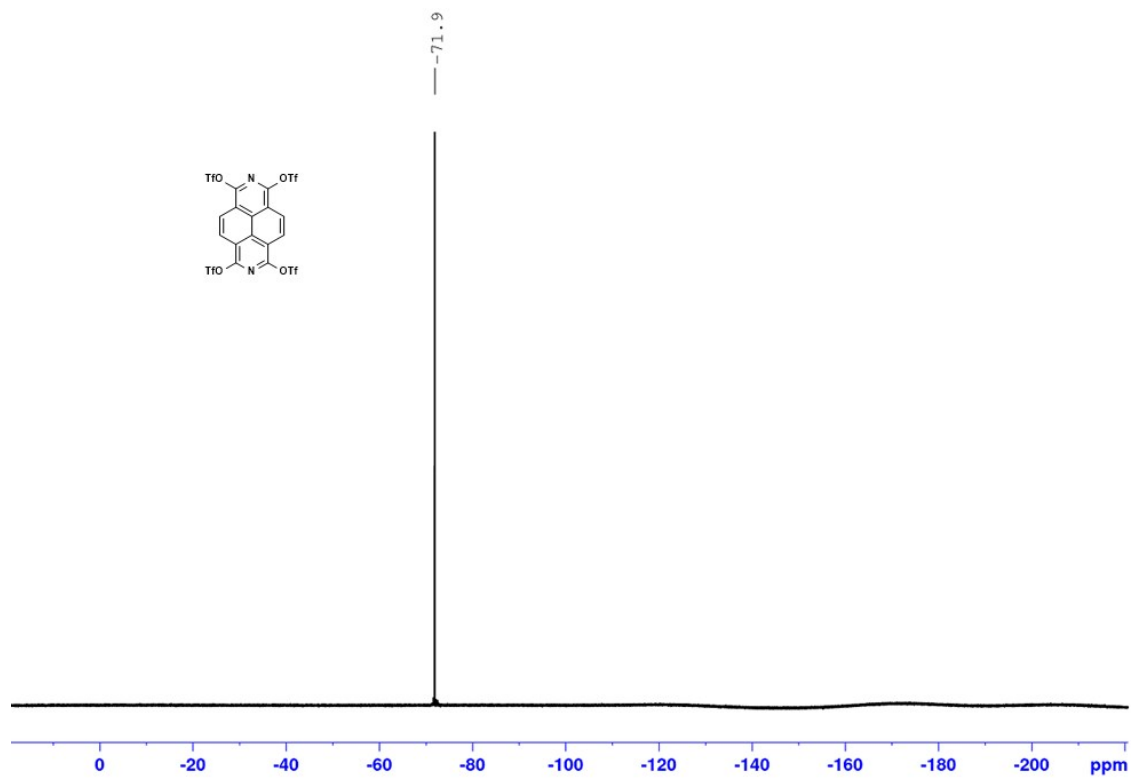

Figure S21.  $^{19}\text{F}$ -NMR (235.3 MHz, 298K,  $\text{CDCl}_3^*$ ) of **2d**.

1,3,6,8-Tetrakis(trimethylsilyl)ethynylbenzo[*lmn*][3,8]phenanthroline (**3b**)

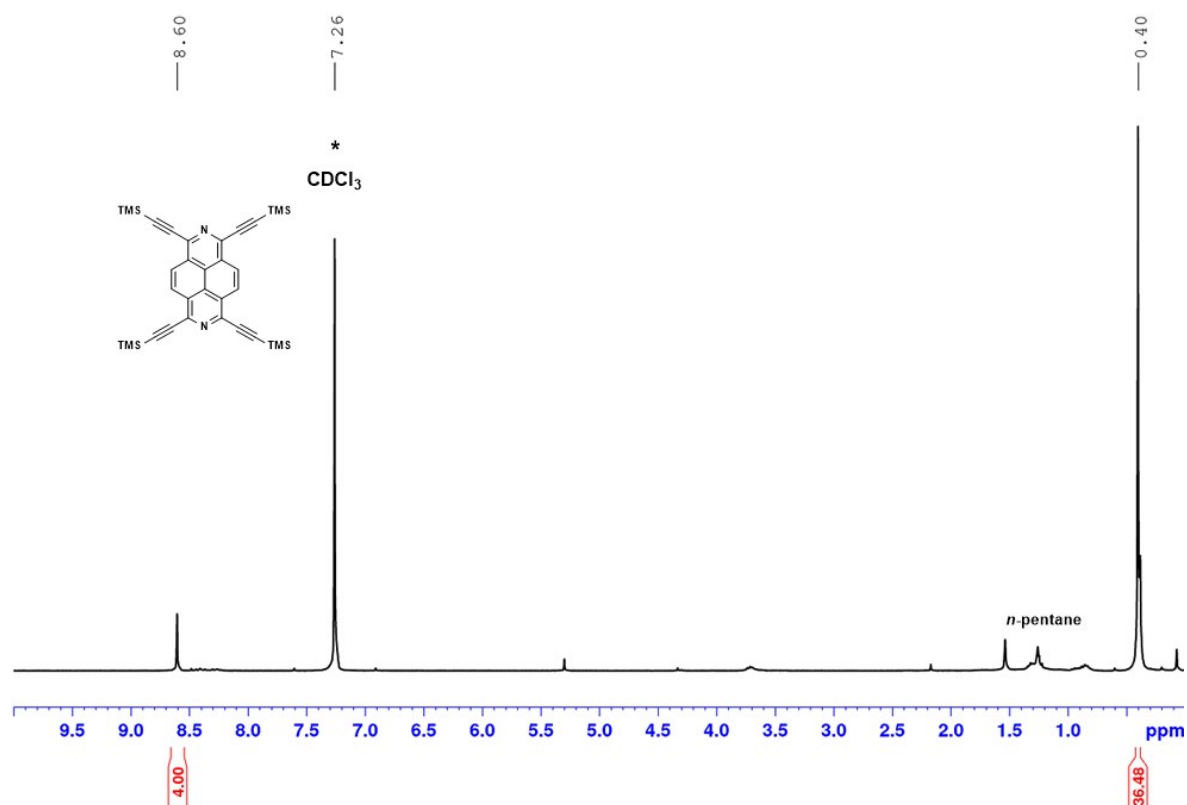

Figure S22.  $^1\text{H-NMR}$  (300.1 MHz, 298K,  $\text{CDCl}_3^*$ ) of **3b**. Contains residual *n*-pentane and silicon grease.

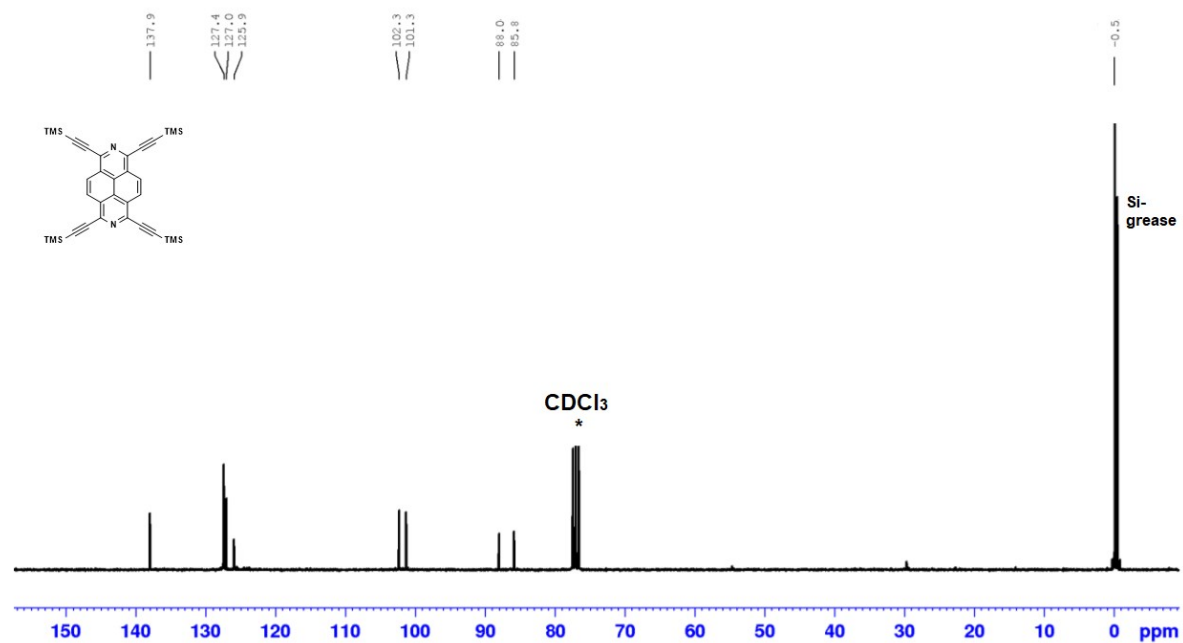

Figure S23.  $^{13}\text{C-NMR}$  (75.1 MHz, 298K,  $\text{CDCl}_3^*$ ) of **3b**.

1,3,6,8-Tetrakis((4-*tert*-butyl)phenyl)ethynyl)benzo[*lmn*][3,8]phenanthroline (**3d**)

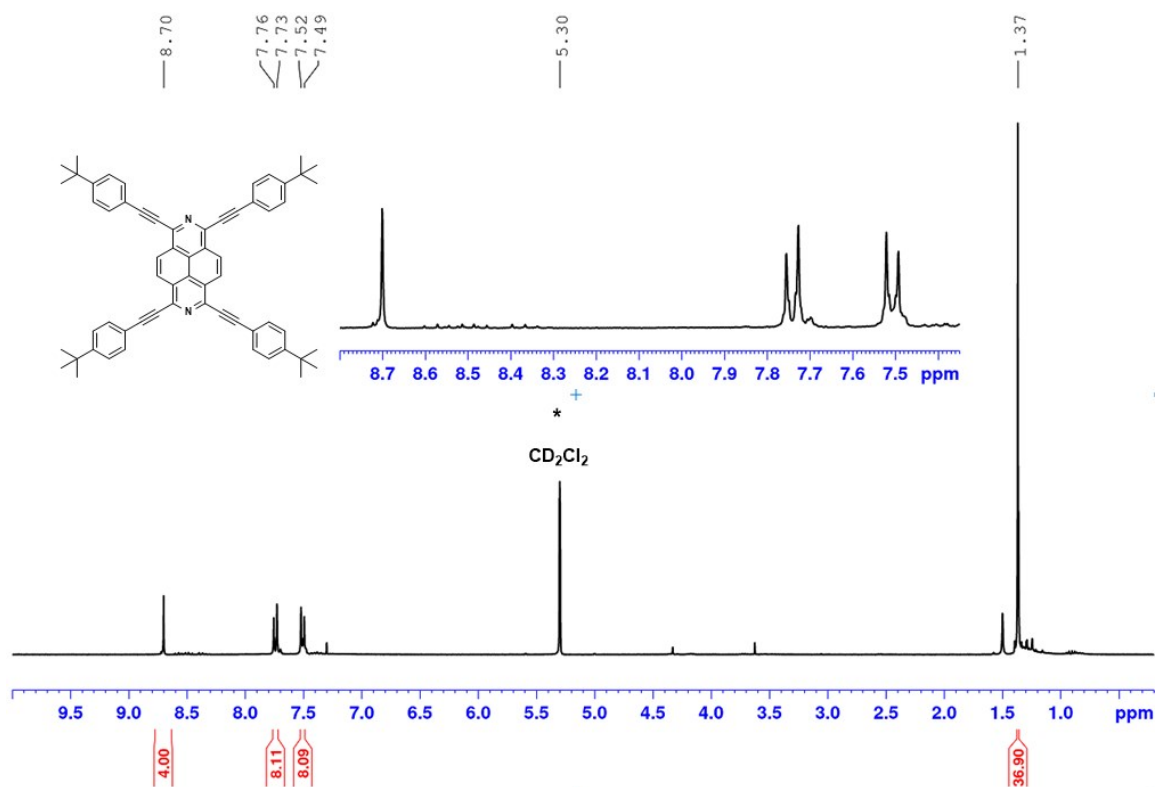

Figure S24. <sup>1</sup>H-NMR (300.1 MHz, 298K, CD<sub>2</sub>Cl<sub>2</sub>\*) of **3c**.

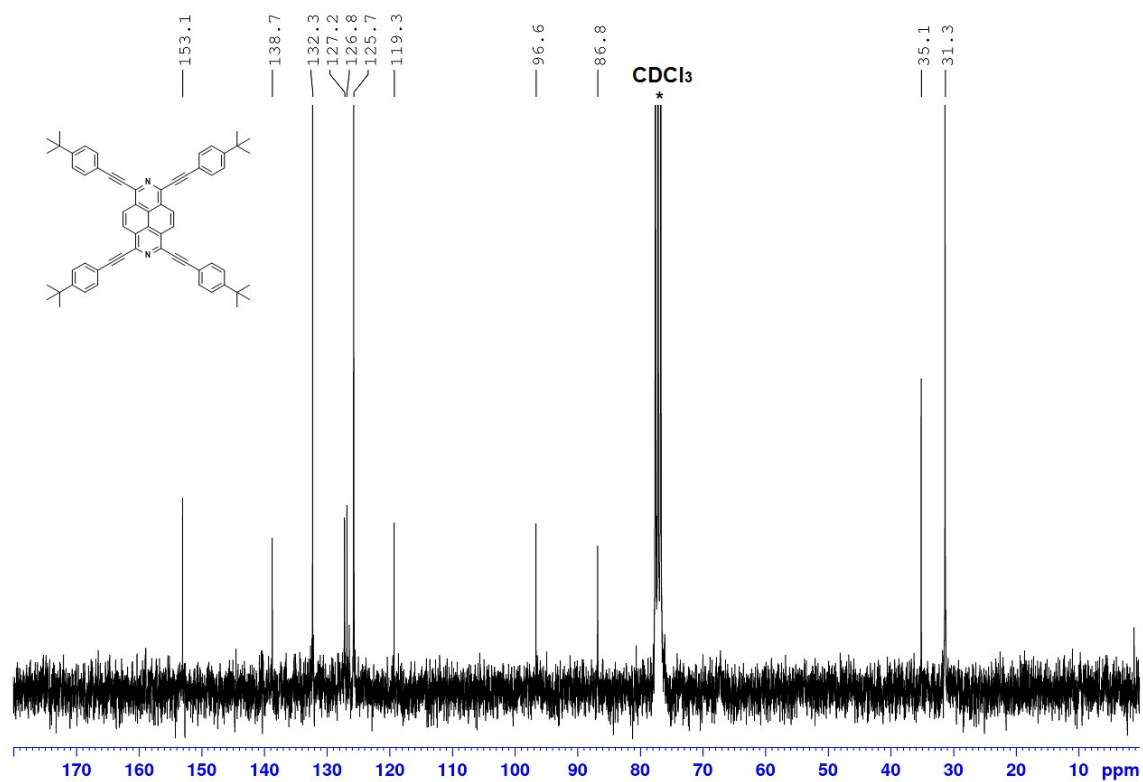

Figure S25. <sup>13</sup>C-NMR (75.1 MHz, 298K, CDCl<sub>3</sub>\*) of **3b**.
